# Supplementary material for: Host genetics and diet, but not immunoglobulin A expression, converge to shape compositional features of the gut microbiome in an advanced intercross population of mice
Source: PubMed Central journal article supplement (PMC4290092; doi:10.1186/s13059-014-0552-6), 2014-12-17
Supplement: 13059_2014_552_MOESM2_ESM.pdf [file 13059_2014_552_MOESM2_ESM.pdf]

Additional file 2. Estimates of four random components (cohort, family, litter, and residual) and their proportion of the total variation, for each of the 203 microbiota taxa.

| Taxon                          | Variance Components |        |        |          | % of Total Variation |        |        |          |
|--------------------------------|---------------------|--------|--------|----------|----------------------|--------|--------|----------|
|                                | Cohort              | Family | Litter | Residual | Cohort               | Family | Parity | Residual |
| <i>Alistipes</i>               | 0.0003              | 0.0000 | 0.0008 | 0.0247   | 1.30                 | 0.00   | 3.24   | 95.46    |
| <i>Bacteroides</i>             | 0.0112              | 0.0013 | 0.0073 | 0.0578   | 14.46                | 1.63   | 9.46   | 74.45    |
| <i>Parabacteroides</i>         | 0.0082              | 0.0069 | 0.0021 | 0.0659   | 9.89                 | 8.32   | 2.56   | 79.23    |
| <i>Helicobacter</i>            | 0.0082              | 0.0072 | 0.0075 | 0.1219   | 5.68                 | 4.97   | 5.16   | 84.19    |
| <i>Oscillibacter</i>           | 0.0008              | 0.0000 | 0.0044 | 0.0492   | 1.40                 | 0.00   | 8.04   | 90.56    |
| <i>Odoribacter</i>             | 0.0161              | 0.0019 | 0.0062 | 0.0475   | 22.51                | 2.60   | 8.60   | 66.29    |
| <i>Dorea</i>                   | 0.0059              | 0.0041 | 0.0054 | 0.0452   | 9.76                 | 6.80   | 8.95   | 74.48    |
| <i>Lactococcus</i>             | 0.0386              | 0.0029 | 0.0010 | 0.1200   | 23.77                | 1.76   | 0.60   | 73.86    |
| <i>Lactobacillus</i>           | 0.0538              | 0.0034 | 0.0000 | 0.4223   | 11.21                | 0.72   | 0.00   | 88.07    |
| <i>Mucispirillum</i>           | 0.0134              | 0.0186 | 0.0217 | 0.3226   | 3.57                 | 4.93   | 5.77   | 85.73    |
| <i>TM7_genera_incertae_se</i>  |                     |        |        |          |                      |        |        |          |
| <i>dis</i>                     | 0.0650              | 0.0000 | 0.0924 | 0.3004   | 14.20                | 0.00   | 20.18  | 65.62    |
| <i>Ureaplasma</i>              | 0.1073              | 0.0544 | 0.0402 | 0.3002   | 21.37                | 10.83  | 8.00   | 59.80    |
| <i>Roseburia</i>               | 0.1059              | 0.0022 | 0.0000 | 0.2018   | 34.16                | 0.71   | 0.00   | 65.13    |
| <i>Butyricoccus</i>            | 0.0460              | 0.0082 | 0.0451 | 0.2239   | 14.23                | 2.52   | 13.95  | 69.29    |
| <i>Turicibacter</i>            | 0.0653              | 0.0347 | 0.0000 | 0.6429   | 8.78                 | 4.68   | 0.00   | 86.54    |
| <i>Rikenella</i>               | 0.0657              | 0.0412 | 0.0226 | 0.4245   | 11.86                | 7.44   | 4.08   | 76.62    |
| <i>Alistipes_OTU15</i>         | 0.0003              | 0.0000 | 0.0039 | 0.0294   | 0.81                 | 0.00   | 11.62  | 87.57    |
| <i>Alistipes_OTU13</i>         | 0.0006              | 0.0001 | 0.0000 | 0.0297   | 1.82                 | 0.27   | 0.00   | 97.91    |
| <i>Bacteroides_OTU3</i>        | 0.0122              | 0.0000 | 0.0112 | 0.1099   | 9.13                 | 0.00   | 8.40   | 82.47    |
| <i>HelicobacterganmaniT</i>    | 0.0059              | 0.0084 | 0.0150 | 0.1540   | 3.22                 | 4.61   | 8.18   | 83.99    |
| <i>Oscillibacter_OTU3</i>      | 0.0018              | 0.0004 | 0.0050 | 0.0517   | 3.07                 | 0.67   | 8.45   | 87.81    |
| <i>Parabacteroides_OTU3</i>    | 0.0114              | 0.0173 | 0.0276 | 0.1563   | 5.36                 | 8.13   | 12.98  | 73.53    |
| <i>Parabacteroides_OTU6</i>    | 0.0018              | 0.0000 | 0.0892 | 0.3831   | 0.38                 | 0.00   | 18.81  | 80.81    |
| <i>Odoribacter_OTU6</i>        | 0.0147              | 0.0029 | 0.0039 | 0.0490   | 20.85                | 4.10   | 5.53   | 69.51    |
| <i>Bacteroides_OTU12</i>       | 0.0455              | 0.0723 | 0.0000 | 0.2970   | 10.97                | 17.44  | 0.00   | 71.59    |
| <i>Parabacteroides_OTU2</i>    | 0.0299              | 0.0139 | 0.0003 | 0.1653   | 14.28                | 6.62   | 0.15   | 78.95    |
| <i>Dorea_OTU7</i>              | 0.0068              | 0.0000 | 0.0071 | 0.0537   | 10.10                | 0.00   | 10.52  | 79.38    |
| <i>LactMG1363</i>              | 0.0399              | 0.0010 | 0.0032 | 0.1312   | 22.74                | 0.59   | 1.82   | 74.85    |
| <i>Bacteroides_OTU13</i>       | 0.0211              | 0.0079 | 0.0248 | 0.1572   | 10.02                | 3.76   | 11.74  | 74.48    |
| <i>Lactobacillusapodemit</i>   | 0.0683              | 0.0000 | 0.0000 | 0.4052   | 14.43                | 0.00   | 0.00   | 85.57    |
| <i>Odoribacter_OTU1</i>        | 0.0076              | 0.0000 | 0.0102 | 0.0684   | 8.81                 | 0.00   | 11.79  | 79.40    |
| <i>Mucispirillumchaedlerit</i> | 0.0134              | 0.0186 | 0.0217 | 0.3226   | 3.57                 | 4.93   | 5.77   | 85.73    |
| <i>Dorea_OTU12</i>             | 0.0368              | 0.0352 | 0.0166 | 0.1653   | 14.47                | 13.88  | 6.55   | 65.10    |
| <i>Bacteroides_OTU0</i>        | 0.0158              | 0.0000 | 0.0007 | 0.1872   | 7.75                 | 0.00   | 0.36   | 91.89    |
| <i>Oscillibacter_OTU14</i>     | 0.0000              | 0.0060 | 0.0125 | 0.1504   | 0.00                 | 3.55   | 7.41   | 89.04    |
| <i>UreaplasmaurealyticumT</i>  | 0.1198              | 0.0362 | 0.0512 | 0.2839   | 24.39                | 7.37   | 10.43  | 57.81    |
| <i>LactococcusSK11</i>         | 0.0491              | 0.0095 | 0.0000 | 0.1610   | 22.36                | 4.34   | 0.00   | 73.30    |
| <i>Alistipes_OTU2</i>          | 0.0199              | 0.0056 | 0.0063 | 0.1425   | 11.41                | 3.22   | 3.62   | 81.76    |
| <i>Helicobacter51449</i>       | 0.0125              | 0.0482 | 0.0000 | 0.2770   | 3.69                 | 14.28  | 0.00   | 82.02    |

|                               |        |        |        |        |       |       |       |       |
|-------------------------------|--------|--------|--------|--------|-------|-------|-------|-------|
| <i>Oscillibacter_OTU6</i>     | 0.0361 | 0.0346 | 0.0142 | 0.2297 | 11.47 | 10.99 | 4.52  | 73.03 |
| <i>Butyrivicoccus_OTU7</i>    | 0.0485 | 0.0069 | 0.0484 | 0.2298 | 14.55 | 2.08  | 14.51 | 68.86 |
| <i>Roseburia_OTU7</i>         | 0.1799 | 0.0087 | 0.0000 | 0.2276 | 43.22 | 2.09  | 0.00  | 54.69 |
| <i>Lactobacillus33200</i>     | 0.0630 | 0.0541 | 0.0405 | 0.5581 | 8.80  | 7.56  | 5.65  | 77.98 |
| <i>TM7_genera_incertae_se</i> |        |        |        |        |       |       |       |       |
| <i>dis_OTU143</i>             | 0.0436 | 0.0140 | 0.0543 | 0.2717 | 11.37 | 3.65  | 14.15 | 70.83 |
| <i>Parabacteroides_OTU8</i>   | 0.0152 | 0.0013 | 0.0186 | 0.1338 | 8.99  | 0.78  | 11.04 | 79.20 |
| <i>Parabacteroides_OTU9</i>   | 0.0182 | 0.0000 | 0.0078 | 0.1509 | 10.28 | 0.00  | 4.40  | 85.31 |
| <i>Odoribacter_OTU2</i>       | 0.1468 | 0.0242 | 0.0638 | 0.1831 | 35.13 | 5.80  | 15.26 | 43.82 |
| <i>Bacteroides_OTU7</i>       | 0.0456 | 0.0108 | 0.0111 | 0.3360 | 11.30 | 2.67  | 2.76  | 83.27 |
| OTU4825                       | 0.0053 | 0.0000 | 0.0034 | 0.1054 | 4.66  | 0.00  | 2.96  | 92.38 |
| OTU12405                      | 0.0159 | 0.0072 | 0.0000 | 0.0606 | 19.03 | 8.64  | 0.00  | 72.33 |
| OTU13263                      | 0.0082 | 0.0000 | 0.0055 | 0.1001 | 7.18  | 0.00  | 4.84  | 87.98 |
| OTU10148                      | 0.0024 | 0.0445 | 0.0171 | 0.1412 | 1.15  | 21.68 | 8.34  | 68.83 |
| OTU20373                      | 0.0020 | 0.0000 | 0.0054 | 0.0824 | 2.21  | 0.00  | 6.00  | 91.79 |
| OTU26285                      | 0.0346 | 0.0048 | 0.0041 | 0.1477 | 18.07 | 2.53  | 2.16  | 77.24 |
| OTU20360                      | 0.0327 | 0.0081 | 0.0334 | 0.1428 | 15.07 | 3.74  | 15.37 | 65.82 |
| OTU27073                      | 0.0924 | 0.0120 | 0.0000 | 0.2033 | 30.01 | 3.91  | 0.00  | 66.08 |
| OTU21224                      | 0.0141 | 0.0000 | 0.0342 | 0.2953 | 4.11  | 0.00  | 9.94  | 85.94 |
| OTU20075                      | 0.0168 | 0.0000 | 0.0056 | 0.1101 | 12.65 | 0.00  | 4.22  | 83.13 |
| OTU22342                      | 0.0786 | 0.0000 | 0.0809 | 0.3008 | 17.07 | 0.00  | 17.59 | 65.35 |
| OTU21636                      | 0.0031 | 0.0090 | 0.0003 | 0.1032 | 2.66  | 7.80  | 0.22  | 89.32 |
| OTU20097                      | 0.0014 | 0.0023 | 0.0021 | 0.0741 | 1.79  | 2.92  | 2.69  | 92.61 |
| OTU17491                      | 0.0206 | 0.0455 | 0.0290 | 0.1739 | 7.65  | 16.92 | 10.78 | 64.65 |
| OTU18932                      | 0.0100 | 0.0000 | 0.0123 | 0.1048 | 7.89  | 0.00  | 9.67  | 82.44 |
| OTU24696                      | 0.0025 | 0.0398 | 0.0148 | 0.1499 | 1.23  | 19.22 | 7.16  | 72.39 |
| OTU17740                      | 0.0319 | 0.0590 | 0.0182 | 0.3957 | 6.33  | 11.68 | 3.60  | 78.39 |
| OTU26865                      | 0.0235 | 0.0000 | 0.0062 | 0.1044 | 17.51 | 0.00  | 4.65  | 77.84 |
| OTU20442                      | 0.0389 | 0.0202 | 0.0218 | 0.1420 | 17.46 | 9.05  | 9.78  | 63.71 |
| OTU22207                      | 0.0297 | 0.0154 | 0.0034 | 0.1123 | 18.49 | 9.55  | 2.11  | 69.85 |
| OTU23028                      | 0.0199 | 0.0440 | 0.0182 | 0.1721 | 7.83  | 17.30 | 7.17  | 67.70 |
| OTU14860                      | 0.0192 | 0.0064 | 0.0009 | 0.1345 | 11.94 | 3.97  | 0.56  | 83.54 |
| OTU16767                      | 0.0032 | 0.0123 | 0.0074 | 0.1145 | 2.34  | 8.93  | 5.37  | 83.36 |
| OTU28397                      | 0.0058 | 0.0016 | 0.0041 | 0.1412 | 3.82  | 1.02  | 2.71  | 92.45 |
| OTU15300                      | 0.0131 | 0.0000 | 0.0316 | 0.2815 | 4.02  | 0.00  | 9.68  | 86.30 |
| OTU18390                      | 0.0080 | 0.0042 | 0.0179 | 0.1561 | 4.30  | 2.27  | 9.61  | 83.82 |
| OTU19694                      | 0.0096 | 0.0090 | 0.0016 | 0.1529 | 5.53  | 5.20  | 0.90  | 88.38 |
| OTU25269                      | 0.0193 | 0.0684 | 0.0171 | 0.4041 | 3.79  | 13.44 | 3.36  | 79.41 |
| OTU26116                      | 0.0288 | 0.0406 | 0.0057 | 0.3748 | 6.41  | 9.03  | 1.27  | 83.29 |
| OTU28603                      | 0.0141 | 0.0069 | 0.0017 | 0.1400 | 8.65  | 4.26  | 1.04  | 86.04 |
| OTU28842                      | 0.0635 | 0.0000 | 0.0306 | 0.1753 | 23.55 | 0.00  | 11.37 | 65.08 |
| OTU33579                      | 0.0085 | 0.0039 | 0.0022 | 0.1440 | 5.34  | 2.47  | 1.36  | 90.83 |
| OTU16090                      | 0.0697 | 0.0703 | 0.0322 | 0.3522 | 13.30 | 13.40 | 6.14  | 67.17 |
| OTU15957                      | 0.0133 | 0.0000 | 0.0357 | 0.2688 | 4.18  | 0.00  | 11.25 | 84.58 |
| OTU17350                      | 0.0095 | 0.0127 | 0.0183 | 0.1548 | 4.84  | 6.49  | 9.38  | 79.29 |

|          |        |        |        |        |       |       |       |       |
|----------|--------|--------|--------|--------|-------|-------|-------|-------|
| OTU24985 | 0.0022 | 0.0000 | 0.0125 | 0.1153 | 1.69  | 0.00  | 9.60  | 88.72 |
| OTU25379 | 0.0346 | 0.0158 | 0.0218 | 0.2086 | 12.31 | 5.62  | 7.75  | 74.31 |
| OTU27979 | 0.0163 | 0.0000 | 0.0000 | 0.1286 | 11.24 | 0.00  | 0.00  | 88.76 |
| OTU30658 | 0.0338 | 0.0601 | 0.0337 | 0.3011 | 7.87  | 14.03 | 7.87  | 70.24 |
| OTU33243 | 0.0010 | 0.0000 | 0.0094 | 0.0899 | 0.97  | 0.00  | 9.41  | 89.61 |
| OTU35558 | 0.0111 | 0.0000 | 0.0040 | 0.1271 | 7.82  | 0.00  | 2.78  | 89.40 |
| OTU14099 | 0.0698 | 0.0572 | 0.0351 | 0.3236 | 14.38 | 11.77 | 7.22  | 66.62 |
| OTU5148  | 0.0293 | 0.0000 | 0.0061 | 0.1059 | 20.73 | 0.00  | 4.32  | 74.96 |
| OTU9731  | 0.0176 | 0.0000 | 0.0286 | 0.1539 | 8.79  | 0.00  | 14.30 | 76.91 |
| OTU11339 | 0.0495 | 0.0363 | 0.0000 | 0.4110 | 9.96  | 7.31  | 0.00  | 82.74 |
| OTU12689 | 0.0149 | 0.0025 | 0.0142 | 0.1372 | 8.83  | 1.48  | 8.41  | 81.29 |
| OTU14730 | 0.0738 | 0.0473 | 0.0337 | 0.3385 | 14.97 | 9.59  | 6.83  | 68.61 |
| OTU15709 | 0.0028 | 0.0074 | 0.0115 | 0.1257 | 1.89  | 5.00  | 7.78  | 85.33 |
| OTU17032 | 0.0051 | 0.0482 | 0.0000 | 0.1366 | 2.70  | 25.38 | 0.00  | 71.92 |
| OTU18150 | 0.0029 | 0.0006 | 0.0095 | 0.1132 | 2.26  | 0.49  | 7.54  | 89.71 |
| OTU19325 | 0.0405 | 0.0285 | 0.0127 | 0.3450 | 9.50  | 6.67  | 2.99  | 80.84 |
| OTU19623 | 0.0040 | 0.0099 | 0.0054 | 0.1547 | 2.28  | 5.67  | 3.08  | 88.97 |
| OTU20333 | 0.0057 | 0.0000 | 0.0963 | 0.4182 | 1.10  | 0.00  | 18.51 | 80.39 |
| OTU20576 | 0.0149 | 0.0046 | 0.0000 | 0.1024 | 12.22 | 3.76  | 0.00  | 84.01 |
| OTU22045 | 0.0688 | 0.0550 | 0.0596 | 0.3192 | 13.69 | 10.95 | 11.85 | 63.50 |
| OTU22363 | 0.0321 | 0.0093 | 0.0302 | 0.3032 | 8.57  | 2.48  | 8.05  | 80.89 |
| OTU23005 | 0.0904 | 0.0512 | 0.0263 | 0.3459 | 17.59 | 9.96  | 5.12  | 67.33 |
| OTU23606 | 0.0207 | 0.0425 | 0.0307 | 0.1708 | 7.83  | 16.06 | 11.61 | 64.50 |
| OTU23975 | 0.0235 | 0.0000 | 0.0090 | 0.1860 | 10.77 | 0.00  | 4.11  | 85.12 |
| OTU24715 | 0.0102 | 0.0000 | 0.0222 | 0.2250 | 3.95  | 0.00  | 8.64  | 87.41 |
| OTU27116 | 0.0355 | 0.0499 | 0.0048 | 0.1493 | 14.81 | 20.84 | 2.00  | 62.35 |
| OTU28205 | 0.0000 | 0.0068 | 0.0366 | 0.1693 | 0.00  | 3.22  | 17.22 | 79.56 |
| OTU28969 | 0.0063 | 0.0112 | 0.0219 | 0.2099 | 2.51  | 4.49  | 8.80  | 84.20 |
| OTU32093 | 0.0118 | 0.0000 | 0.0192 | 0.1427 | 6.78  | 0.00  | 11.07 | 82.15 |
| OTU32230 | 0.0157 | 0.0123 | 0.0047 | 0.1949 | 6.90  | 5.40  | 2.05  | 85.65 |
| OTU33421 | 0.0000 | 0.0030 | 0.0056 | 0.1299 | 0.00  | 2.17  | 4.06  | 93.77 |
| OTU33984 | 0.0057 | 0.0012 | 0.0147 | 0.1731 | 2.91  | 0.64  | 7.57  | 88.89 |
| OTU35368 | 0.0000 | 0.0000 | 0.0107 | 0.1454 | 0.00  | 0.00  | 6.85  | 93.15 |
| OTU35998 | 0.0150 | 0.0000 | 0.0130 | 0.1754 | 7.37  | 0.00  | 6.41  | 86.22 |
| OTU36484 | 0.0566 | 0.0097 | 0.0298 | 0.2634 | 15.75 | 2.71  | 8.28  | 73.26 |
| OTU36691 | 0.0391 | 0.0092 | 0.0000 | 0.1511 | 19.62 | 4.63  | 0.00  | 75.75 |
| OTU40042 | 0.0225 | 0.0173 | 0.0150 | 0.1560 | 10.67 | 8.19  | 7.11  | 74.03 |
| OTU42388 | 0.0096 | 0.0051 | 0.0000 | 0.2199 | 4.07  | 2.15  | 0.00  | 93.77 |
| OTU3615  | 0.0700 | 0.1454 | 0.0756 | 0.5360 | 8.47  | 17.58 | 9.14  | 64.82 |
| OTU10057 | 0.0418 | 0.0332 | 0.0091 | 0.2404 | 12.89 | 10.23 | 2.79  | 74.09 |
| OTU13989 | 0.0001 | 0.0060 | 0.0000 | 0.1416 | 0.06  | 4.05  | 0.00  | 95.89 |
| OTU14011 | 0.0148 | 0.0000 | 0.0012 | 0.1203 | 10.85 | 0.00  | 0.91  | 88.24 |
| OTU14750 | 0.0045 | 0.0037 | 0.0120 | 0.1999 | 2.05  | 1.70  | 5.44  | 90.81 |
| OTU15028 | 0.0140 | 0.0313 | 0.0000 | 0.2679 | 4.47  | 10.01 | 0.00  | 85.52 |
| OTU15766 | 0.0165 | 0.0227 | 0.0067 | 0.1845 | 7.18  | 9.85  | 2.90  | 80.08 |

|          |        |        |        |        |       |       |       |       |
|----------|--------|--------|--------|--------|-------|-------|-------|-------|
| OTU16297 | 0.0784 | 0.0478 | 0.1566 | 0.5048 | 9.96  | 6.07  | 19.88 | 64.09 |
| OTU17060 | 0.0069 | 0.0000 | 0.0085 | 0.1453 | 4.27  | 0.00  | 5.30  | 90.43 |
| OTU17889 | 0.0304 | 0.0197 | 0.0000 | 0.1476 | 15.37 | 9.97  | 0.00  | 74.66 |
| OTU17986 | 0.0064 | 0.0000 | 0.0137 | 0.1322 | 4.19  | 0.00  | 9.02  | 86.79 |
| OTU19048 | 0.0046 | 0.0156 | 0.0070 | 0.1311 | 2.88  | 9.84  | 4.43  | 82.85 |
| OTU19337 | 0.0093 | 0.0014 | 0.0025 | 0.1326 | 6.38  | 0.94  | 1.71  | 90.97 |
| OTU20456 | 0.0000 | 0.0026 | 0.0976 | 0.3308 | 0.00  | 0.61  | 22.65 | 76.74 |
| OTU20718 | 0.0048 | 0.0266 | 0.0302 | 0.1378 | 2.42  | 13.32 | 15.17 | 69.09 |
| OTU21089 | 0.0479 | 0.0449 | 0.0307 | 0.2885 | 11.63 | 10.90 | 7.45  | 70.02 |
| OTU21103 | 0.0301 | 0.0025 | 0.0251 | 0.2351 | 10.29 | 0.86  | 8.57  | 80.29 |
| OTU21572 | 0.0146 | 0.0069 | 0.0179 | 0.1777 | 6.73  | 3.19  | 8.24  | 81.83 |
| OTU21685 | 0.0203 | 0.0106 | 0.0000 | 0.2368 | 7.57  | 3.95  | 0.00  | 88.47 |
| OTU21738 | 0.0241 | 0.0124 | 0.0087 | 0.1536 | 12.10 | 6.26  | 4.39  | 77.24 |
| OTU22931 | 0.0174 | 0.0125 | 0.0042 | 0.1544 | 9.25  | 6.64  | 2.22  | 81.89 |
| OTU23082 | 0.0093 | 0.0055 | 0.0165 | 0.1855 | 4.31  | 2.52  | 7.61  | 85.56 |
| OTU23089 | 0.0893 | 0.0283 | 0.0634 | 0.4806 | 13.50 | 4.28  | 9.59  | 72.64 |
| OTU23189 | 0.0085 | 0.0374 | 0.0000 | 0.2627 | 2.76  | 12.12 | 0.00  | 85.12 |
| OTU23411 | 0.0081 | 0.0000 | 0.0697 | 0.3657 | 1.82  | 0.00  | 15.71 | 82.47 |
| OTU23692 | 0.0324 | 0.0491 | 0.0320 | 0.3008 | 7.82  | 11.85 | 7.72  | 72.61 |
| OTU24471 | 0.0042 | 0.0143 | 0.0345 | 0.2272 | 1.49  | 5.09  | 12.31 | 81.11 |
| OTU24562 | 0.1247 | 0.0370 | 0.0221 | 0.4530 | 19.59 | 5.80  | 3.47  | 71.14 |
| OTU24722 | 0.0018 | 0.0060 | 0.0020 | 0.1336 | 1.26  | 4.19  | 1.41  | 93.14 |
| OTU24936 | 0.0100 | 0.0000 | 0.0738 | 0.3879 | 2.11  | 0.00  | 15.64 | 82.25 |
| OTU25483 | 0.0061 | 0.0450 | 0.0000 | 0.2683 | 1.91  | 14.09 | 0.00  | 84.00 |
| OTU25795 | 0.0167 | 0.0448 | 0.0298 | 0.2734 | 4.58  | 12.29 | 8.17  | 74.97 |
| OTU26092 | 0.1147 | 0.0071 | 0.0794 | 0.4003 | 19.07 | 1.19  | 13.19 | 66.55 |
| OTU26118 | 0.0373 | 0.0189 | 0.0401 | 0.3433 | 8.49  | 4.31  | 9.12  | 78.08 |
| OTU26847 | 0.0625 | 0.0135 | 0.0124 | 0.2435 | 18.83 | 4.08  | 3.75  | 73.34 |
| OTU27145 | 0.0092 | 0.0024 | 0.0137 | 0.1464 | 5.36  | 1.43  | 7.96  | 85.25 |
| OTU27257 | 0.0426 | 0.0538 | 0.0332 | 0.3055 | 9.79  | 12.36 | 7.62  | 70.22 |
| OTU28290 | 0.0210 | 0.0181 | 0.0181 | 0.2910 | 6.04  | 5.20  | 5.19  | 83.57 |
| OTU28553 | 0.0000 | 0.0052 | 0.0024 | 0.1279 | 0.00  | 3.82  | 1.81  | 94.37 |
| OTU28557 | 0.0040 | 0.0052 | 0.0169 | 0.1218 | 2.71  | 3.49  | 11.42 | 82.38 |
| OTU28882 | 0.0084 | 0.0000 | 0.0041 | 0.1414 | 5.47  | 0.00  | 2.67  | 91.86 |
| OTU28957 | 0.1092 | 0.0000 | 0.0242 | 0.3082 | 24.74 | 0.00  | 5.48  | 69.79 |
| OTU28965 | 0.1398 | 0.0607 | 0.0201 | 0.2421 | 30.22 | 13.12 | 4.35  | 52.32 |
| OTU29084 | 0.0218 | 0.0094 | 0.0000 | 0.1612 | 11.35 | 4.89  | 0.00  | 83.76 |
| OTU29342 | 0.0022 | 0.0277 | 0.0359 | 0.1649 | 0.95  | 12.00 | 15.54 | 71.50 |
| OTU29519 | 0.0061 | 0.0130 | 0.0000 | 0.1482 | 3.67  | 7.79  | 0.00  | 88.55 |
| OTU29609 | 0.0342 | 0.0000 | 0.0172 | 0.1488 | 17.08 | 0.00  | 8.57  | 74.34 |
| OTU29627 | 0.0000 | 0.0000 | 0.0075 | 0.2607 | 0.00  | 0.00  | 2.81  | 97.19 |
| OTU30089 | 0.0007 | 0.0233 | 0.0390 | 0.1668 | 0.30  | 10.16 | 16.96 | 72.58 |
| OTU30111 | 0.0422 | 0.0033 | 0.0055 | 0.1250 | 23.97 | 1.85  | 3.12  | 71.06 |
| OTU30174 | 0.0887 | 0.0112 | 0.0190 | 0.2607 | 23.36 | 2.95  | 5.01  | 68.67 |
| OTU30840 | 0.0370 | 0.0000 | 0.0249 | 0.1946 | 14.44 | 0.00  | 9.69  | 75.87 |

|          |        |        |        |        |       |       |       |       |
|----------|--------|--------|--------|--------|-------|-------|-------|-------|
| OTU31095 | 0.1059 | 0.0008 | 0.0180 | 0.1419 | 39.72 | 0.29  | 6.75  | 53.23 |
| OTU32740 | 0.0293 | 0.0000 | 0.0127 | 0.1794 | 13.23 | 0.00  | 5.73  | 81.04 |
| OTU33382 | 0.0127 | 0.0000 | 0.0000 | 0.1473 | 7.96  | 0.00  | 0.00  | 92.04 |
| OTU33451 | 0.0124 | 0.0093 | 0.0146 | 0.1502 | 6.65  | 4.97  | 7.81  | 80.57 |
| OTU33466 | 0.0154 | 0.0069 | 0.0089 | 0.2626 | 5.23  | 2.34  | 3.02  | 89.41 |
| OTU33934 | 0.0250 | 0.0036 | 0.0235 | 0.1933 | 10.18 | 1.45  | 9.56  | 78.81 |
| OTU34075 | 0.0124 | 0.0075 | 0.0099 | 0.2233 | 4.90  | 2.98  | 3.90  | 88.22 |
| OTU34721 | 0.0184 | 0.0078 | 0.0025 | 0.1402 | 10.92 | 4.61  | 1.48  | 83.00 |
| OTU34852 | 0.0557 | 0.0010 | 0.0079 | 0.1615 | 24.64 | 0.45  | 3.49  | 71.43 |
| OTU35400 | 0.0419 | 0.0015 | 0.0000 | 0.1313 | 23.99 | 0.85  | 0.02  | 75.13 |
| OTU35548 | 0.0092 | 0.0022 | 0.0088 | 0.1509 | 5.35  | 1.30  | 5.16  | 88.19 |
| OTU35875 | 0.0130 | 0.0024 | 0.0010 | 0.1556 | 7.57  | 1.41  | 0.59  | 90.43 |
| OTU35889 | 0.0162 | 0.0212 | 0.0056 | 0.2890 | 4.87  | 6.40  | 1.67  | 87.06 |
| OTU35979 | 0.0050 | 0.0110 | 0.0242 | 0.1626 | 2.47  | 5.41  | 11.95 | 80.16 |
| OTU36501 | 0.0323 | 0.0092 | 0.0099 | 0.1912 | 13.33 | 3.78  | 4.08  | 78.81 |
| OTU36628 | 0.0206 | 0.0131 | 0.0217 | 0.2027 | 7.98  | 5.06  | 8.39  | 78.56 |
| OTU36970 | 0.0109 | 0.0217 | 0.0158 | 0.1648 | 5.09  | 10.19 | 7.41  | 77.31 |
| OTU37029 | 0.0129 | 0.0068 | 0.0078 | 0.1231 | 8.58  | 4.53  | 5.19  | 81.70 |
| OTU37543 | 0.0062 | 0.0094 | 0.0000 | 0.1282 | 4.31  | 6.55  | 0.00  | 89.14 |
| OTU39601 | 0.0370 | 0.0063 | 0.0056 | 0.2065 | 14.50 | 2.47  | 2.20  | 80.83 |
| OTU40229 | 0.0052 | 0.0000 | 0.0041 | 0.1159 | 4.16  | 0.00  | 3.29  | 92.55 |
| OTU40602 | 0.0216 | 0.0010 | 0.0049 | 0.1100 | 15.74 | 0.70  | 3.57  | 80.00 |
| OTU40690 | 0.0334 | 0.0320 | 0.0000 | 0.1426 | 16.06 | 15.40 | 0.00  | 68.54 |
| OTU40724 | 0.0228 | 0.0000 | 0.0135 | 0.1889 | 10.11 | 0.00  | 6.00  | 83.90 |
| OTU41353 | 0.0214 | 0.0146 | 0.0000 | 0.1572 | 11.08 | 7.54  | 0.00  | 81.38 |
| OTU41913 | 0.0366 | 0.0000 | 0.0036 | 0.1376 | 20.59 | 0.00  | 2.00  | 77.41 |
| OTU43368 | 0.0181 | 0.0045 | 0.0029 | 0.1427 | 10.74 | 2.68  | 1.74  | 84.84 |
| OTU46742 | 0.0107 | 0.0095 | 0.0004 | 0.1320 | 7.00  | 6.22  | 0.26  | 86.52 |
| OTU47648 | 0.0072 | 0.0048 | 0.0064 | 0.1937 | 3.39  | 2.26  | 3.03  | 91.32 |
| OTU76611 | 0.0126 | 0.0059 | 0.0227 | 0.1717 | 5.92  | 2.79  | 10.65 | 80.64 |

---
