# Supplementary material for: Host genetics and diet, but not immunoglobulin A expression, converge to shape compositional features of the gut microbiome in an advanced intercross population of mice
Source: PubMed Central journal article supplement (PMC4290092; doi:10.1186/s13059-014-0552-6), 2014-12-17

# G4

|                |   |   |
|----------------|---|---|
| Bacteroidetes  | — | — |
| Proteobacteria | — | — |
| Actinobacteria | — | — |
| Firmicutes     | — | — |

# G10

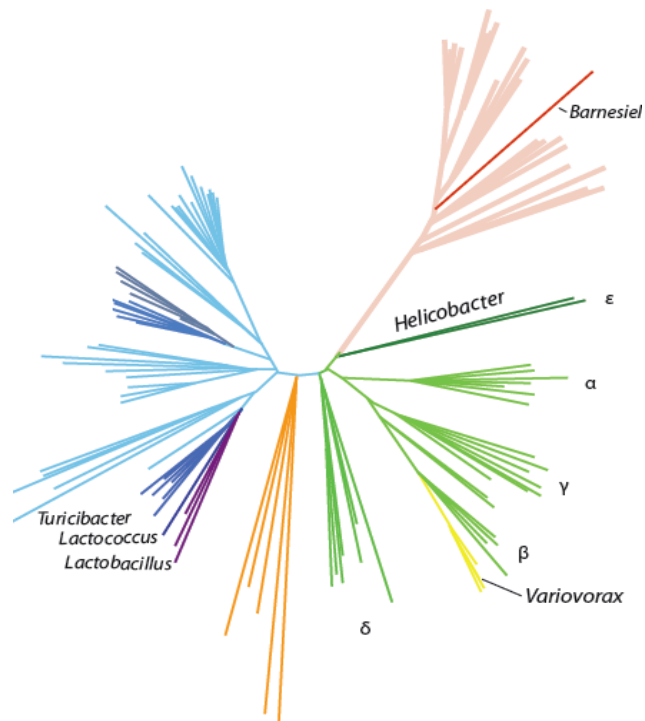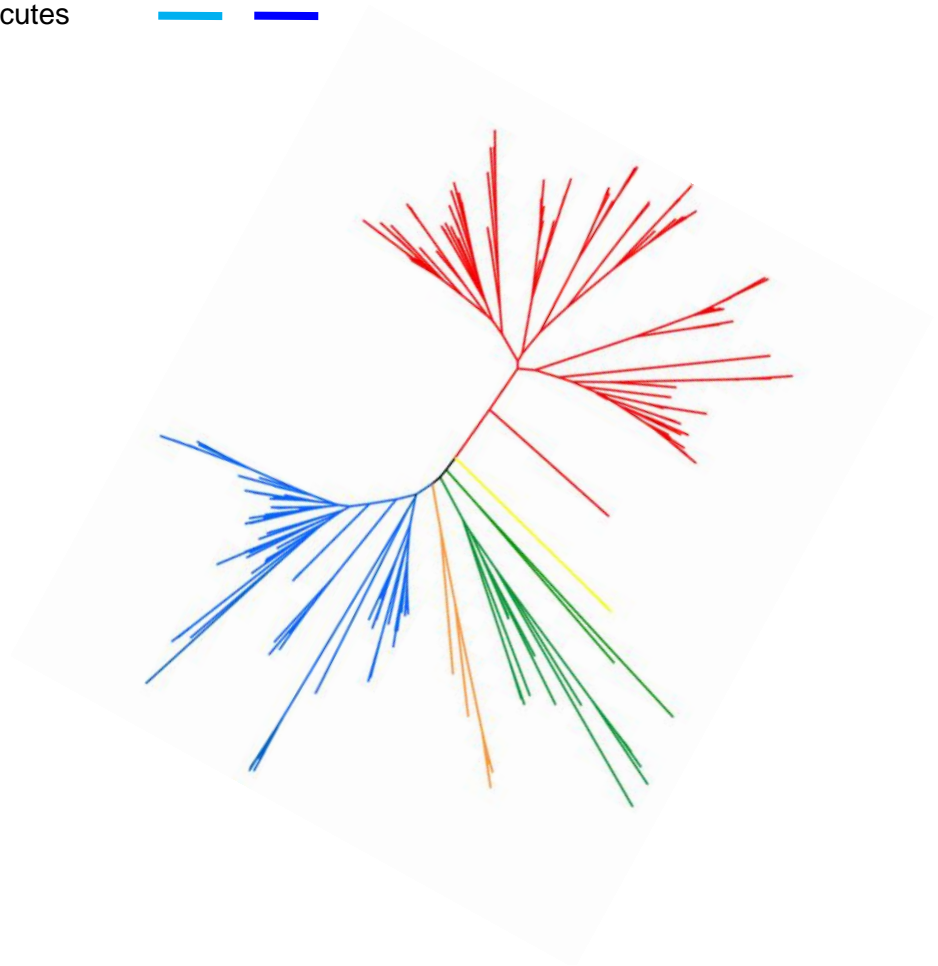

Supplement: 13059_2014_552_MOESM3_ESM.pdf [file 13059_2014_552_MOESM3_ESM.pdf]
