# Supplementary material for: Host genetics and diet, but not immunoglobulin A expression, converge to shape compositional features of the gut microbiome in an advanced intercross population of mice
Source: PubMed Central journal article supplement (PMC4290092; doi:10.1186/s13059-014-0552-6), 2014-12-17
Supplement: 13059_2014_552_MOESM4_ESM.pdf [file 13059_2014_552_MOESM4_ESM.pdf]

| Rank   | Taxon                        | Mean     | Median   | Standard D | Minimum  | Maximum  |
|--------|------------------------------|----------|----------|------------|----------|----------|
| phylum | <i>Actinobacteria</i>        | -3.19057 | -3.18984 | 0.614641   | -4.64687 | -0.46494 |
| phylum | <i>Bacteroidetes</i>         | -1.20611 | -1.1447  | 0.411206   | -2.83603 | -0.36688 |
| phylum | <i>Cyanobacteria</i>         | -3.09911 | -3.20276 | 0.826736   | -4.4516  | -0.46906 |
| phylum | <i>Firmicutes</i>            | -0.83769 | -0.86166 | 0.298357   | -1.7675  | -0.10447 |
| phylum | <i>Proteobacteria</i>        | -1.6144  | -1.55853 | 0.46635    | -4.054   | -0.22595 |
| phylum | <i>TM7</i>                   | -2.40866 | -2.29094 | 0.59878    | -4.27678 | -1.18612 |
| class  | <i>Actinobacteria</i>        | -3.19057 | -3.18984 | 0.614641   | -4.64687 | -0.46494 |
| class  | <i>Alphaproteobacteria</i>   | -3.42676 | -3.52627 | 0.618384   | -4.64687 | -1.64374 |
| class  | <i>Bacilli</i>               | -1.23417 | -1.23771 | 0.520657   | -2.48579 | -0.10626 |
| class  | <i>Bacteroidia</i>           | -1.21015 | -1.14994 | 0.41212    | -2.87079 | -0.3676  |
| class  | <i>Betaproteobacteria</i>    | -2.40094 | -2.38145 | 0.500164   | -4.054   | -0.54811 |
| class  | <i>Clostridia</i>            | -1.30633 | -1.28025 | 0.213934   | -2.49186 | -0.70922 |
| class  | <i>Cyanobacteria</i>         | -3.09911 | -3.20276 | 0.826736   | -4.4516  | -0.46906 |
| class  | <i>Epsilonproteobacteria</i> | -2.20364 | -1.88716 | 0.956221   | -4.64687 | -0.51214 |
| class  | <i>Erysipelotrichi</i>       | -2.49994 | -2.54562 | 0.877167   | -4.55945 | -0.42552 |
| class  | <i>Gammaproteobacteria</i>   | -2.63435 | -2.58818 | 0.653046   | -4.26221 | -0.24354 |
| order  | <i>Bacillales</i>            | -3.08396 | -3.11361 | 0.633737   | -4.36256 | -0.69915 |
| order  | <i>Bacteroidales</i>         | -1.21015 | -1.14994 | 0.41212    | -2.87079 | -0.3676  |
| order  | <i>Burkholderiales</i>       | -2.42552 | -2.40386 | 0.509457   | -4.054   | -0.56194 |
| order  | <i>Campylobacteriales</i>    | -2.20364 | -1.88716 | 0.956221   | -4.64687 | -0.51214 |
| order  | <i>Clostridiales</i>         | -1.30634 | -1.28025 | 0.213936   | -2.49186 | -0.70922 |
| order  | <i>Enterobacteriales</i>     | -3.36754 | -3.35358 | 0.547795   | -4.64687 | -1.5487  |
| order  | <i>Erysipelotrichales</i>    | -2.49994 | -2.54562 | 0.877167   | -4.55945 | -0.42552 |
| order  | <i>Lactobacillales</i>       | -1.25191 | -1.2597  | 0.522845   | -2.51879 | -0.10626 |
| order  | <i>Pseudomonadales</i>       | -2.97615 | -2.95049 | 0.607164   | -4.4516  | -0.24354 |
| family | <i>Bacteroidaceae</i>        | -1.84075 | -1.78637 | 0.539524   | -4.25101 | -0.56328 |
| family | <i>Chloroplast</i>           | -3.0997  | -3.20276 | 0.827561   | -4.60249 | -0.46906 |
| family | <i>Comamonadaceae</i>        | -2.57645 | -2.56674 | 0.517346   | -4.054   | -0.57141 |
| family | <i>Enterobacteriaceae</i>    | -3.36754 | -3.35358 | 0.547795   | -4.64687 | -1.5487  |
| family | <i>Erysipelotrichaceae</i>   | -2.49994 | -2.54562 | 0.877167   | -4.55945 | -0.42552 |
| family | <i>Helicobacteraceae</i>     | -2.2174  | -1.88767 | 0.973223   | -4.64687 | -0.51214 |
| family | <i>Incertae Sedis XIII</i>   | -3.44172 | -3.39076 | 0.421002   | -4.54888 | -2.39368 |
| family | <i>Lachnospiraceae</i>       | -1.75276 | -1.73965 | 0.261692   | -3.03593 | -0.97874 |
| family | <i>Lactobacillaceae</i>      | -1.74941 | -1.78549 | 0.710664   | -4.08408 | -0.10741 |
| family | <i>Leuconostocaceae</i>      | -2.69641 | -2.60737 | 0.570624   | -4.4567  | -1.14245 |
| family | <i>Moraxellaceae</i>         | -3.27338 | -3.23729 | 0.556482   | -4.4567  | -1.80805 |
| family | <i>Porphyromonadaceae</i>    | -1.65123 | -1.55873 | 0.461944   | -4.25101 | -0.68982 |
| family | <i>Pseudomonadaceae</i>      | -3.33827 | -3.33036 | 0.653186   | -4.60249 | -0.24379 |
| family | <i>Rikenellaceae</i>         | -1.74743 | -1.69201 | 0.405664   | -3.13704 | -0.9474  |
| family | <i>Ruminococcaceae</i>       | -1.58681 | -1.54628 | 0.273405   | -3.04013 | -0.71772 |
| family | <i>Staphylococcaceae</i>     | -3.28371 | -3.35558 | 0.697969   | -4.57636 | -0.69915 |
| family | <i>Streptococcaceae</i>      | -1.7532  | -1.84831 | 0.586326   | -3.2864  | -0.27968 |
| genus  | <i>Acidovorax</i>            | -3.46804 | -3.49721 | 0.568918   | -4.48199 | -1.44669 |
| genus  | <i>Acinetobacter</i>         | -3.2981  | -3.26345 | 0.557951   | -4.4567  | -1.81114 |
| genus  | <i>Alistipes</i>             | -1.80916 | -1.76913 | 0.418428   | -3.15619 | -0.96023 |
| genus  | <i>Anaerovorax</i>           | -3.4424  | -3.39076 | 0.421483   | -4.54888 | -2.39368 |

|         |                                           |          |          |          |          |          |
|---------|-------------------------------------------|----------|----------|----------|----------|----------|
| genus   | <i>Bacteroides</i>                        | -1.84075 | -1.78637 | 0.539524 | -4.25101 | -0.56328 |
| genus   | <i>Butyricicoccus</i>                     | -3.12847 | -3.08934 | 0.547655 | -4.38396 | -1.89672 |
| genus   | <i>Dorea</i>                              | -1.87215 | -1.84829 | 0.290798 | -3.03593 | -1.00098 |
| genus   | <i>Helicobacter</i>                       | -2.21755 | -1.88767 | 0.973256 | -4.64687 | -0.51214 |
| genus   | <i>Lactobacillus</i>                      | -1.74941 | -1.78549 | 0.710664 | -4.08408 | -0.10741 |
| genus   | <i>Lactococcus</i>                        | -1.76753 | -1.85944 | 0.593581 | -3.2864  | -0.28022 |
| genus   | <i>Leuconostoc</i>                        | -3.37483 | -3.33594 | 0.491983 | -4.6313  | -1.97467 |
| genus   | <i>Odoribacter</i>                        | -2.25905 | -2.20892 | 0.472891 | -4.25101 | -1.31754 |
| genus   | <i>Oscillibacter</i>                      | -1.63201 | -1.58462 | 0.288863 | -3.52827 | -1.07909 |
| genus   | <i>Parabacteroides</i>                    | -1.81992 | -1.74717 | 0.500228 | -4.25101 | -0.6969  |
| genus   | <i>Pseudomonas</i>                        | -3.33867 | -3.33036 | 0.653305 | -4.60249 | -0.24379 |
| genus   | <i>Rikenella</i>                          | -3.05039 | -2.83105 | 0.783282 | -4.55945 | -1.60787 |
| genus   | <i>Roseburia</i>                          | -2.64471 | -2.59433 | 0.434967 | -4.25667 | -1.45208 |
| genus   | <i>Streptococcus</i>                      | -3.54715 | -3.55121 | 0.524559 | -4.64687 | -1.39531 |
| genus   | <i>Streptophyta</i>                       | -3.09971 | -3.20276 | 0.827555 | -4.60249 | -0.46906 |
| genus   | <i>TM7_genera_incertae_sedis</i>          | -2.40866 | -2.29094 | 0.59878  | -4.27678 | -1.18612 |
| genus   | <i>Turicibacter</i>                       | -2.71959 | -2.78561 | 1.030603 | -4.55945 | -0.4258  |
| genus   | <i>Variovorax</i>                         | -2.82857 | -2.84029 | 0.579754 | -4.25101 | -0.64626 |
| genus   | <i>Weissella</i>                          | -2.83751 | -2.70329 | 0.639479 | -4.64687 | -1.20845 |
| species | <i>Acinetobacter junii SH205</i>          | -3.47148 | -3.50978 | 0.567486 | -4.6313  | -1.83342 |
| species | <i>Alistipes_OTU11</i>                    | -2.11161 | -2.05525 | 0.427259 | -3.85516 | -1.26842 |
| species | <i>Alistipes_OTU9</i>                     | -2.14951 | -2.13978 | 0.46028  | -4.23533 | -1.21399 |
| species | <i>Anaerovorax odorimutans (T)</i>        | -3.44869 | -3.40295 | 0.421989 | -4.54888 | -2.39368 |
| species | <i>Bacteroides_OTU1</i>                   | -2.78441 | -2.67251 | 0.961569 | -4.64687 | -0.76623 |
| species | <i>Bacteroides_OTU17</i>                  | -2.49121 | -2.46785 | 0.691637 | -4.30612 | -0.77056 |
| species | <i>Bacteroides_OTU21</i>                  | -2.71022 | -2.67348 | 0.61911  | -4.50226 | -0.68252 |
| species | <i>Butyricicoccus_OTU6</i>                | -3.15399 | -3.1154  | 0.564175 | -4.51092 | -1.89672 |
| species | <i>Dorea longicatena DSM 13814</i>        | -2.36784 | -2.35411 | 0.311116 | -3.83658 | -1.46842 |
| species | <i>Helicobacter ganmani (T)</i>           | -2.23827 | -1.90919 | 0.972735 | -4.64687 | -0.51426 |
| species | <i>Lactobacillus apodemi (T)</i>          | -2.00552 | -1.99539 | 0.749607 | -4.21548 | -0.2863  |
| species | <i>Lactobacillus johnsonii ATCC 35261</i> | -2.80012 | -2.90586 | 0.953665 | -4.54888 | -0.10779 |
| species | <i>Lactococcus lactis subsp. cremoris</i> | -2.07914 | -2.12129 | 0.672315 | -3.90466 | -0.50728 |
| species | <i>Lactococcus lactis subsp. cremoris</i> | -2.18527 | -2.24201 | 0.599832 | -4.03214 | -0.53762 |
| species | <i>Leuconostoc citreum KM20</i>           | -3.37557 | -3.33594 | 0.49168  | -4.6313  | -1.97467 |
| species | <i>Odoribacter_OTU3</i>                   | -2.85187 | -2.76297 | 0.598281 | -4.37723 | -1.64085 |
| species | <i>Odoribacter_OTU6</i>                   | -2.45372 | -2.39076 | 0.453557 | -4.25101 | -1.62771 |
| species | <i>Oscillibacter_OTU18</i>                | -2.84293 | -2.78661 | 0.445496 | -4.41929 | -1.71246 |
| species | <i>Oscillibacter_OTU5</i>                 | -1.70635 | -1.66359 | 0.296221 | -3.52827 | -1.0981  |
| species | <i>Oscillibacter_OTU8</i>                 | -3.22396 | -3.13194 | 0.64276  | -4.4567  | -1.71814 |
| species | <i>OTU10059</i>                           | -3.61574 | -3.58482 | 0.717842 | -4.78302 | -2.04879 |
| species | <i>OTU100635</i>                          | -4.07641 | -4.40085 | 0.644617 | -4.9479  | -1.994   |
| species | <i>OTU10180</i>                           | -3.80517 | -3.83658 | 0.648205 | -4.81195 | -2.25018 |
| species | <i>OTU10250</i>                           | -3.87864 | -4.37519 | 0.871435 | -4.85926 | -1.27116 |
| species | <i>OTU10810</i>                           | -4.04452 | -4.40688 | 0.739492 | -4.93233 | -1.27015 |
| species | <i>OTU10815</i>                           | -3.47717 | -3.40083 | 0.742625 | -4.84001 | -2.04756 |
| species | <i>OTU109685</i>                          | -4.07846 | -4.40078 | 0.636706 | -5.02378 | -1.51063 |
| species | <i>OTU111345</i>                          | -3.61488 | -3.53129 | 0.653347 | -4.90352 | -1.78221 |

|         |           |          |          |          |          |          |
|---------|-----------|----------|----------|----------|----------|----------|
| species | OTU11309  | -3.36035 | -3.2837  | 0.757491 | -4.87739 | -1.40144 |
| species | OTU11573  | -3.10033 | -2.94052 | 0.74066  | -4.93233 | -1.71972 |
| species | OTU118435 | -3.7291  | -3.7759  | 0.681505 | -4.9479  | -1.83989 |
| species | OTU119723 | -3.89061 | -3.99463 | 0.635751 | -4.9479  | -2.20326 |
| species | OTU12637  | -4.12298 | -4.39263 | 0.605222 | -5.02378 | -1.9065  |
| species | OTU12884  | -4.01975 | -4.35141 | 0.651102 | -5.02378 | -1.99758 |
| species | OTU12948  | -3.62006 | -3.52264 | 0.488057 | -4.7489  | -2.53283 |
| species | OTU1311   | -3.34027 | -3.25237 | 0.828055 | -4.75773 | -1.36371 |
| species | OTU1370   | -3.74091 | -3.74241 | 0.604181 | -5.02378 | -2.27746 |
| species | OTU14515  | -2.88147 | -2.48592 | 1.214826 | -4.93233 | -0.99988 |
| species | OTU14778  | -2.3405  | -2.2071  | 0.770515 | -4.87739 | -0.81285 |
| species | OTU15542  | -3.52757 | -3.43008 | 0.590226 | -4.6973  | -1.81561 |
| species | OTU15599  | -3.98079 | -4.35395 | 0.6772   | -4.9479  | -2.34901 |
| species | OTU15621  | -2.72934 | -2.63188 | 0.759325 | -4.72032 | -0.82946 |
| species | OTU15852  | -2.9158  | -2.77163 | 0.754775 | -4.9479  | -1.53102 |
| species | OTU16644  | -3.57069 | -3.50379 | 0.631004 | -4.77273 | -2.0539  |
| species | OTU16771  | -3.77041 | -3.78704 | 0.627962 | -4.90352 | -2.34286 |
| species | OTU16907  | -3.34571 | -3.25565 | 0.76087  | -4.93233 | -1.98368 |
| species | OTU17214  | -3.64056 | -3.59244 | 0.705112 | -4.9479  | -1.88235 |
| species | OTU17277  | -4.12783 | -4.41704 | 0.705146 | -5.02378 | -1.42246 |
| species | OTU17532  | -3.23373 | -3.1594  | 0.772274 | -4.9479  | -1.57487 |
| species | OTU1754   | -3.65547 | -3.6185  | 0.620907 | -4.84001 | -2.07064 |
| species | OTU17916  | -3.59306 | -3.55121 | 0.635098 | -4.7489  | -2.03914 |
| species | OTU18194  | -3.93396 | -4.04135 | 0.601667 | -4.78302 | -2.05809 |
| species | OTU18550  | -2.8939  | -2.69556 | 0.720274 | -4.7489  | -1.51658 |
| species | OTU18933  | -3.50712 | -3.41577 | 0.6534   | -5.02378 | -2.00116 |
| species | OTU19064  | -3.60713 | -3.64157 | 0.814385 | -4.86048 | -1.54217 |
| species | OTU19089  | -3.85027 | -3.999   | 0.69254  | -4.9479  | -1.79934 |
| species | OTU19169  | -3.51471 | -3.56324 | 0.839679 | -4.86048 | -1.43294 |
| species | OTU19497  | -3.73166 | -3.77934 | 0.656358 | -4.9479  | -1.61958 |
| species | OTU20339  | -2.3626  | -2.26317 | 0.737521 | -4.66626 | -0.98974 |
| species | OTU20360  | -2.80858 | -2.59988 | 0.746414 | -4.93233 | -1.5156  |
| species | OTU20550  | -3.84391 | -3.88247 | 0.648093 | -4.85926 | -2.34425 |
| species | OTU20553  | -2.90934 | -2.67025 | 0.910885 | -4.87739 | -1.28408 |
| species | OTU20580  | -3.42148 | -3.3934  | 0.86792  | -4.86048 | -1.33443 |
| species | OTU20628  | -3.99287 | -4.2999  | 0.623813 | -4.9479  | -2.29122 |
| species | OTU21345  | -2.86668 | -2.75051 | 0.720151 | -4.9479  | -1.28267 |
| species | OTU21486  | -3.33413 | -3.15874 | 0.696693 | -4.9479  | -2.08784 |
| species | OTU21516  | -4.1548  | -4.42015 | 0.653733 | -4.93233 | -1.55403 |
| species | OTU21517  | -3.93222 | -4.03222 | 0.604007 | -4.9479  | -1.94417 |
| species | OTU21756  | -3.65664 | -3.56225 | 0.589912 | -4.86048 | -2.37057 |
| species | OTU22095  | -3.72566 | -3.73388 | 0.646545 | -4.9479  | -2.14825 |
| species | OTU22302  | -3.79149 | -4.32976 | 0.94491  | -4.93233 | -1.07396 |
| species | OTU22570  | -3.11864 | -2.94349 | 0.655318 | -4.78302 | -1.72283 |
| species | OTU22574  | -3.40792 | -3.28001 | 0.590209 | -4.81195 | -2.2072  |
| species | OTU22618  | -3.43432 | -3.31709 | 0.72649  | -4.93233 | -1.33829 |
| species | OTU22876  | -3.35517 | -3.25334 | 0.753412 | -4.9479  | -1.43361 |

|         |           |          |          |          |          |          |
|---------|-----------|----------|----------|----------|----------|----------|
| species | OTU22892  | -3.59662 | -3.62675 | 0.768    | -4.9479  | -1.72987 |
| species | OTU23162  | -3.8867  | -3.92547 | 0.610727 | -4.87739 | -2.24698 |
| species | OTU23399  | -3.01818 | -3.02001 | 0.95746  | -5.02378 | -1.36247 |
| species | OTU23401  | -3.26045 | -2.96209 | 0.944632 | -4.9479  | -1.52655 |
| species | OTU23520  | -3.4137  | -3.27852 | 0.647696 | -4.81195 | -1.46343 |
| species | OTU23521  | -3.14677 | -3.07151 | 0.51531  | -4.76337 | -2.03668 |
| species | OTU23591  | -4.35042 | -4.44765 | 0.46547  | -5.02378 | -1.21209 |
| species | OTU23632  | -4.05169 | -4.34084 | 0.589542 | -4.9479  | -2.18221 |
| species | OTU23893  | -3.24796 | -3.10358 | 0.665633 | -4.9479  | -1.90283 |
| species | OTU23901  | -3.6434  | -3.76065 | 0.753222 | -4.86048 | -1.89245 |
| species | OTU24957  | -3.16799 | -3.08975 | 0.607516 | -4.78302 | -1.82906 |
| species | OTU25398  | -3.51036 | -3.40572 | 0.70716  | -4.9479  | -1.98126 |
| species | OTU25443  | -3.94077 | -4.27903 | 0.656551 | -4.93233 | -2.18915 |
| species | OTU255658 | -4.05042 | -4.35472 | 0.618173 | -5.02378 | -1.48086 |
| species | OTU25567  | -3.57916 | -3.49087 | 0.602017 | -4.9479  | -2.16777 |
| species | OTU25580  | -2.79023 | -2.68931 | 0.622751 | -4.66359 | -1.49569 |
| species | OTU26078  | -3.53094 | -3.51182 | 0.793481 | -4.87739 | -1.51721 |
| species | OTU26150  | -3.84625 | -3.85205 | 0.593466 | -4.80419 | -2.27425 |
| species | OTU26207  | -4.00827 | -4.29164 | 0.608823 | -4.86048 | -2.09954 |
| species | OTU26335  | -3.96149 | -4.19667 | 0.615594 | -4.9479  | -1.95059 |
| species | OTU26562  | -2.75857 | -2.64591 | 0.56831  | -4.70253 | -1.49097 |
| species | OTU26691  | -2.72722 | -2.55042 | 0.852519 | -4.72032 | -0.95849 |
| species | OTU2681   | -3.65527 | -3.65475 | 0.702151 | -4.93233 | -1.97387 |
| species | OTU26919  | -3.76705 | -3.75686 | 0.563221 | -4.76337 | -2.3891  |
| species | OTU26927  | -3.11909 | -3.20119 | 1.092727 | -4.9479  | -0.41051 |
| species | OTU26940  | -3.15281 | -2.99191 | 0.646928 | -4.85926 | -2.01859 |
| species | OTU2714   | -4.12539 | -4.3927  | 0.603126 | -5.02378 | -1.69682 |
| species | OTU27559  | -2.53373 | -2.44503 | 0.488059 | -4.45649 | -1.62167 |
| species | OTU27668  | -3.37379 | -3.20875 | 0.672856 | -4.7489  | -1.98997 |
| species | OTU27929  | -3.95829 | -4.31998 | 0.703523 | -4.93233 | -1.83902 |
| species | OTU2796   | -3.60507 | -3.54452 | 0.684644 | -4.80329 | -1.75514 |
| species | OTU27993  | -4.14132 | -4.41491 | 0.601863 | -4.93233 | -1.9853  |
| species | OTU28031  | -3.70418 | -3.76492 | 0.692849 | -4.81195 | -1.85716 |
| species | OTU28127  | -4.29004 | -4.4456  | 0.545393 | -4.9479  | -1.26747 |
| species | OTU28357  | -3.24393 | -3.10243 | 0.770966 | -4.9479  | -1.68626 |
| species | OTU28363  | -3.85874 | -3.87823 | 0.593836 | -4.93233 | -2.35147 |
| species | OTU28378  | -3.75889 | -3.7813  | 0.568076 | -4.87739 | -2.3553  |
| species | OTU28641  | -4.12113 | -4.40078 | 0.618598 | -5.02378 | -1.84753 |
| species | OTU28763  | -3.4433  | -3.40346 | 0.790509 | -4.9479  | -1.37227 |
| species | OTU28844  | -3.58532 | -3.48151 | 0.609641 | -4.85926 | -2.37692 |
| species | OTU28881  | -3.2315  | -3.13814 | 0.544248 | -4.74457 | -2.04546 |
| species | OTU29136  | -3.50764 | -3.42234 | 0.638403 | -4.90352 | -2.18115 |
| species | OTU29205  | -3.45279 | -3.3534  | 0.649163 | -4.87739 | -2.15138 |
| species | OTU2939   | -3.63674 | -3.56423 | 0.813222 | -5.02378 | -1.89534 |
| species | OTU29411  | -4.01363 | -4.3204  | 0.63103  | -5.02378 | -2.21073 |
| species | OTU29481  | -3.35032 | -3.10659 | 0.823864 | -4.80329 | -1.76289 |
| species | OTU29497  | -3.87503 | -3.8512  | 0.567573 | -4.9479  | -2.43026 |

|         |          |          |          |          |          |          |
|---------|----------|----------|----------|----------|----------|----------|
| species | OTU29676 | -3.74965 | -3.6936  | 0.534053 | -4.84001 | -2.57394 |
| species | OTU29690 | -3.54901 | -3.45962 | 0.586855 | -4.9479  | -2.05237 |
| species | OTU29993 | -3.73957 | -3.67495 | 0.510351 | -4.80329 | -2.33186 |
| species | OTU30239 | -3.42912 | -3.26521 | 0.612642 | -4.7489  | -2.1839  |
| species | OTU30406 | -3.0865  | -2.98265 | 0.616838 | -4.84991 | -1.75124 |
| species | OTU30440 | -3.86468 | -3.91698 | 0.646418 | -4.84001 | -1.78511 |
| species | OTU30466 | -3.23159 | -3.17493 | 0.658556 | -4.7489  | -1.33681 |
| species | OTU30575 | -3.80856 | -3.80168 | 0.583403 | -5.02378 | -2.3544  |
| species | OTU30906 | -2.98125 | -2.8544  | 0.796941 | -4.78302 | -1.32542 |
| species | OTU30974 | -3.68024 | -3.74593 | 0.754539 | -4.78302 | -2.0299  |
| species | OTU31161 | -3.64097 | -3.64128 | 0.763066 | -4.90352 | -1.71433 |
| species | OTU31225 | -3.47844 | -3.47849 | 0.929298 | -5.02378 | -1.44989 |
| species | OTU31270 | -3.0741  | -2.90719 | 0.776111 | -4.87739 | -1.5814  |
| species | OTU31437 | -3.73291 | -3.74547 | 0.60667  | -4.9479  | -2.3149  |
| species | OTU31812 | -4.13251 | -4.38511 | 0.584323 | -4.9479  | -1.72024 |
| species | OTU31854 | -3.57316 | -3.53832 | 0.72164  | -4.90352 | -2.04173 |
| species | OTU31861 | -3.73152 | -3.81211 | 0.732957 | -4.85926 | -2.18349 |
| species | OTU31900 | -3.00706 | -2.91966 | 0.874355 | -4.78302 | -1.27646 |
| species | OTU32146 | -3.038   | -2.8273  | 0.852627 | -4.75773 | -1.53971 |
| species | OTU32159 | -3.91542 | -4.04036 | 0.629538 | -4.86048 | -2.19348 |
| species | OTU32201 | -3.77034 | -3.87691 | 0.71626  | -4.9479  | -1.56969 |
| species | OTU32261 | -3.61593 | -3.50037 | 0.557959 | -4.81195 | -2.34311 |
| species | OTU32556 | -4.08321 | -4.3898  | 0.670964 | -5.02378 | -1.49192 |
| species | OTU32850 | -3.66376 | -3.57692 | 0.569555 | -4.84001 | -2.28661 |
| species | OTU32953 | -3.37257 | -3.24487 | 0.680441 | -4.87739 | -1.88289 |
| species | OTU33094 | -3.74891 | -3.7402  | 0.646007 | -4.85926 | -2.29057 |
| species | OTU33106 | -4.22365 | -4.43258 | 0.542139 | -5.02378 | -2.07748 |
| species | OTU33162 | -3.20696 | -3.08114 | 0.724066 | -4.9479  | -1.55419 |
| species | OTU3343  | -3.73043 | -4.13033 | 0.922542 | -4.9479  | -1.41134 |
| species | OTU33766 | -3.91775 | -4.05805 | 0.615579 | -5.02378 | -1.95685 |
| species | OTU33959 | -3.89364 | -3.92932 | 0.560359 | -4.9479  | -2.2363  |
| species | OTU33981 | -3.29276 | -3.18427 | 0.596602 | -4.7489  | -2.01747 |
| species | OTU33995 | -3.92046 | -4.19667 | 0.6733   | -4.87739 | -2.01986 |
| species | OTU34250 | -3.18362 | -3.08938 | 0.608237 | -4.7489  | -1.59082 |
| species | OTU34564 | -3.24586 | -3.13155 | 0.747958 | -4.7489  | -1.56467 |
| species | OTU34602 | -3.24108 | -3.1567  | 0.613171 | -4.72032 | -1.73563 |
| species | OTU34676 | -3.89853 | -4.13033 | 0.655265 | -4.9479  | -2.36433 |
| species | OTU34910 | -3.68677 | -3.61023 | 0.477362 | -4.7489  | -2.54375 |
| species | OTU34980 | -3.25223 | -3.13672 | 0.58693  | -4.90352 | -2.05999 |
| species | OTU35123 | -3.60426 | -3.49471 | 0.560047 | -4.85926 | -2.49066 |
| species | OTU35132 | -3.31682 | -3.18549 | 0.600323 | -4.75773 | -2.12905 |
| species | OTU35474 | -3.95614 | -4.24797 | 0.625175 | -4.93233 | -2.35683 |
| species | OTU35522 | -3.53283 | -3.43867 | 0.638097 | -4.93233 | -2.24805 |
| species | OTU35653 | -3.64353 | -3.7608  | 0.825302 | -5.02378 | -1.98934 |
| species | OTU35851 | -3.79157 | -3.89087 | 0.731348 | -4.9479  | -2.19667 |
| species | OTU36357 | -3.77066 | -3.67495 | 0.58071  | -4.93233 | -2.50292 |
| species | OTU3637  | -4.01307 | -4.40688 | 0.767714 | -4.93233 | -1.40201 |

|         |          |          |          |          |          |          |
|---------|----------|----------|----------|----------|----------|----------|
| species | OTU36453 | -4.01822 | -4.37011 | 0.6995   | -5.02378 | -1.66937 |
| species | OTU36913 | -3.18825 | -3.12937 | 1.003814 | -4.93233 | -1.38186 |
| species | OTU36973 | -4.22648 | -4.43014 | 0.580442 | -5.02378 | -1.50455 |
| species | OTU37155 | -3.44059 | -3.36091 | 0.565092 | -4.93233 | -1.93846 |
| species | OTU37416 | -3.90053 | -3.92381 | 0.62554  | -4.9479  | -0.73644 |
| species | OTU37511 | -3.64833 | -3.83487 | 0.898265 | -5.02378 | -1.72442 |
| species | OTU37550 | -4.20592 | -4.43527 | 0.648013 | -5.02378 | -1.37345 |
| species | OTU37576 | -3.31094 | -3.21212 | 0.873071 | -4.87739 | -1.49066 |
| species | OTU37609 | -3.86534 | -3.95775 | 0.666795 | -5.02378 | -2.46379 |
| species | OTU37848 | -3.9184  | -4.23573 | 0.680585 | -4.90352 | -2.04456 |
| species | OTU38053 | -3.39192 | -3.27076 | 0.596936 | -4.80419 | -2.17082 |
| species | OTU38425 | -4.02817 | -4.35311 | 0.636688 | -5.02378 | -2.34439 |
| species | OTU38701 | -3.70682 | -3.63251 | 0.578008 | -4.85926 | -2.37139 |
| species | OTU38736 | -3.88688 | -4.27035 | 0.713231 | -4.9479  | -2.02835 |
| species | OTU390   | -3.64143 | -3.8014  | 0.837914 | -4.9479  | -1.76297 |
| species | OTU39205 | -2.92025 | -2.81258 | 0.547235 | -4.67162 | -1.68994 |
| species | OTU39325 | -3.12088 | -3.00828 | 0.604102 | -4.70449 | -0.70851 |
| species | OTU39477 | -3.77117 | -3.79064 | 0.659269 | -4.85926 | -2.25219 |
| species | OTU39918 | -3.94471 | -4.15537 | 0.609506 | -4.93233 | -2.10206 |
| species | OTU40040 | -3.50302 | -3.41902 | 0.613551 | -4.80419 | -2.0829  |
| species | OTU40052 | -3.67417 | -3.73143 | 0.729797 | -4.87739 | -1.89998 |
| species | OTU40057 | -3.81531 | -3.94171 | 0.689111 | -4.84991 | -2.02474 |
| species | OTU40238 | -3.29668 | -3.22515 | 0.7378   | -4.76337 | -1.82328 |
| species | OTU40448 | -3.10196 | -2.94789 | 0.616058 | -4.84991 | -1.77589 |
| species | OTU4046  | -3.71931 | -3.71834 | 0.677688 | -4.81195 | -2.26293 |
| species | OTU40540 | -2.69623 | -2.47337 | 0.905389 | -4.70862 | -0.99188 |
| species | OTU40685 | -3.38004 | -3.33696 | 0.823593 | -4.9479  | -1.55725 |
| species | OTU40859 | -3.6243  | -3.62944 | 0.715622 | -4.85926 | -1.92627 |
| species | OTU40878 | -3.7845  | -3.94998 | 0.759877 | -4.93233 | -1.85676 |
| species | OTU40993 | -2.8506  | -2.46419 | 0.968362 | -4.75773 | -1.46839 |
| species | OTU41413 | -3.79492 | -3.78774 | 0.53448  | -4.93233 | -1.92942 |
| species | OTU41518 | -3.19363 | -3.0475  | 0.685503 | -4.9479  | -1.8352  |
| species | OTU41577 | -3.79665 | -3.765   | 0.553101 | -4.9479  | -2.66564 |
| species | OTU4201  | -3.45517 | -3.77952 | 1.0806   | -5.02378 | -0.8168  |
| species | OTU42081 | -3.85709 | -3.98159 | 0.669124 | -4.9479  | -2.2796  |
| species | OTU43081 | -3.76787 | -3.88502 | 0.751234 | -5.02378 | -1.97187 |
| species | OTU43451 | -3.84267 | -3.89697 | 0.608082 | -4.93233 | -2.4725  |
| species | OTU43477 | -3.96388 | -4.29164 | 0.651112 | -4.9479  | -2.21465 |
| species | OTU43491 | -3.48437 | -3.38855 | 0.571829 | -4.80419 | -2.06127 |
| species | OTU43960 | -3.94839 | -4.34994 | 0.747613 | -5.02378 | -1.77452 |
| species | OTU44212 | -3.05412 | -2.95122 | 0.607526 | -4.81195 | -1.96136 |
| species | OTU44783 | -3.68508 | -3.63448 | 0.593634 | -4.81195 | -1.93064 |
| species | OTU44879 | -3.51178 | -3.39432 | 0.549508 | -4.74457 | -2.51818 |
| species | OTU44911 | -3.65449 | -3.63367 | 0.684188 | -4.85926 | -1.84608 |
| species | OTU45365 | -3.83212 | -3.86213 | 0.646681 | -4.87739 | -1.8133  |
| species | OTU45531 | -3.81868 | -4.38187 | 0.92046  | -5.02378 | -1.31226 |
| species | OTU46032 | -3.86375 | -3.86106 | 0.550942 | -4.87739 | -2.11492 |

|         |          |          |          |          |          |          |
|---------|----------|----------|----------|----------|----------|----------|
| species | OTU4608  | -2.61585 | -2.47581 | 0.58345  | -4.72032 | -1.45611 |
| species | OTU46167 | -3.52575 | -3.42754 | 0.591575 | -4.84001 | -2.24652 |
| species | OTU4622  | -2.47759 | -2.30151 | 0.888438 | -4.84991 | -1.05422 |
| species | OTU46295 | -3.73663 | -3.80325 | 0.654183 | -4.84991 | -1.94495 |
| species | OTU47045 | -3.82296 | -3.79463 | 0.543541 | -4.85926 | -2.44742 |
| species | OTU47283 | -3.85166 | -3.93817 | 0.654563 | -4.85926 | -2.44299 |
| species | OTU4729  | -3.9816  | -4.33349 | 0.707726 | -5.02378 | -1.56301 |
| species | OTU47332 | -3.84041 | -3.8739  | 0.629218 | -5.02378 | -2.20687 |
| species | OTU47335 | -3.52882 | -3.4553  | 0.530817 | -4.84001 | -2.27078 |
| species | OTU47724 | -3.60262 | -3.53218 | 0.711178 | -4.9479  | -1.87198 |
| species | OTU47830 | -2.94411 | -2.78524 | 0.685899 | -4.72032 | -1.62878 |
| species | OTU47858 | -3.71849 | -3.73878 | 0.661954 | -4.84991 | -1.83285 |
| species | OTU47964 | -4.14405 | -4.40511 | 0.604741 | -5.02378 | -1.78696 |
| species | OTU48141 | -3.978   | -4.28421 | 0.619076 | -5.02378 | -2.11481 |
| species | OTU48279 | -3.46551 | -3.38044 | 0.594879 | -4.81195 | -1.88642 |
| species | OTU48293 | -3.91691 | -4.02111 | 0.6282   | -4.86048 | -1.97947 |
| species | OTU48302 | -3.7995  | -3.90249 | 0.715377 | -4.81195 | -1.65595 |
| species | OTU48397 | -4.08056 | -4.38187 | 0.601058 | -5.02378 | -1.73083 |
| species | OTU48521 | -3.21676 | -3.13071 | 0.683828 | -4.7489  | -1.7911  |
| species | OTU48892 | -4.24127 | -4.4187  | 0.474913 | -4.9479  | -1.72209 |
| species | OTU49049 | -3.6728  | -3.60686 | 0.616179 | -4.81195 | -2.26831 |
| species | OTU49635 | -3.89556 | -4.01708 | 0.630044 | -4.87739 | -2.24797 |
| species | OTU50422 | -3.46763 | -3.3894  | 0.806388 | -5.02378 | -1.53662 |
| species | OTU50512 | -3.89834 | -3.95564 | 0.605167 | -4.85926 | -2.02538 |
| species | OTU50609 | -3.6449  | -3.59813 | 0.710401 | -4.75773 | -1.66815 |
| species | OTU50790 | -3.42756 | -3.22819 | 0.782239 | -5.02378 | -1.95984 |
| species | OTU51156 | -3.65241 | -3.65475 | 0.688257 | -4.9479  | -1.77815 |
| species | OTU51177 | -3.78468 | -3.74032 | 0.567668 | -4.9479  | -2.43726 |
| species | OTU51188 | -3.97972 | -4.23573 | 0.601488 | -4.93233 | -2.3934  |
| species | OTU51268 | -3.21541 | -3.12024 | 0.58978  | -4.72032 | -1.90756 |
| species | OTU51413 | -3.80468 | -4.18096 | 0.793088 | -4.85926 | -1.56846 |
| species | OTU51595 | -3.51988 | -3.46923 | 0.726169 | -4.80419 | -1.96709 |
| species | OTU51780 | -3.73252 | -3.71834 | 0.576674 | -4.7489  | -2.28105 |
| species | OTU52100 | -3.77739 | -4.24797 | 0.862564 | -4.90352 | -1.62182 |
| species | OTU52368 | -3.60365 | -3.537   | 0.709856 | -4.9479  | -2.18568 |
| species | OTU52370 | -3.48029 | -3.45182 | 0.500951 | -4.87739 | -2.16118 |
| species | OTU5244  | -3.79193 | -3.83321 | 0.647931 | -4.9479  | -2.14768 |
| species | OTU52658 | -3.76459 | -3.97183 | 0.813113 | -4.9479  | -1.09956 |
| species | OTU52864 | -3.5465  | -3.46845 | 0.599881 | -4.75924 | -2.11047 |
| species | OTU53206 | -3.7561  | -3.68538 | 0.515651 | -4.85926 | -2.64054 |
| species | OTU53228 | -3.59263 | -3.48567 | 0.576189 | -4.85926 | -2.44167 |
| species | OTU53441 | -3.43098 | -3.32341 | 0.7733   | -5.02378 | -1.73293 |
| species | OTU53615 | -3.84518 | -3.85908 | 0.623009 | -4.87739 | -2.37149 |
| species | OTU53737 | -4.08508 | -4.39347 | 0.661046 | -5.02378 | -1.87913 |
| species | OTU54291 | -3.63853 | -3.59021 | 0.679109 | -4.7489  | -1.86363 |
| species | OTU54456 | -3.86127 | -3.88213 | 0.638364 | -5.02378 | -2.24538 |
| species | OTU55494 | -3.93366 | -4.09258 | 0.589764 | -4.81195 | -2.31226 |

|         |          |          |          |          |          |          |
|---------|----------|----------|----------|----------|----------|----------|
| species | OTU55752 | -3.70299 | -3.6249  | 0.50715  | -4.75773 | -2.53111 |
| species | OTU55854 | -3.72472 | -3.62997 | 0.574821 | -4.90352 | -2.54449 |
| species | OTU55866 | -3.99966 | -4.31998 | 0.640823 | -5.02378 | -1.89202 |
| species | OTU56222 | -3.75756 | -4.14854 | 0.864235 | -4.90352 | -1.58095 |
| species | OTU5650  | -3.87106 | -3.92018 | 0.65405  | -4.9479  | -1.89101 |
| species | OTU56636 | -3.92057 | -3.93485 | 0.5911   | -5.02378 | -1.87252 |
| species | OTU5675  | -3.73636 | -3.73227 | 0.593979 | -4.85926 | -2.40632 |
| species | OTU57343 | -4.07361 | -4.3757  | 0.654209 | -5.02378 | -1.60107 |
| species | OTU5750  | -2.71951 | -2.60894 | 0.609623 | -4.54664 | -1.49624 |
| species | OTU57537 | -3.84248 | -3.83052 | 0.567734 | -4.93233 | -2.06487 |
| species | OTU5790  | -4.08314 | -4.39396 | 0.666728 | -5.02378 | -1.65761 |
| species | OTU57920 | -3.89121 | -3.92865 | 0.603534 | -5.02378 | -2.18973 |
| species | OTU58156 | -3.72255 | -3.64591 | 0.512914 | -4.75924 | -2.6268  |
| species | OTU58813 | -3.46127 | -3.39433 | 0.933313 | -5.02378 | -1.8313  |
| species | OTU58877 | -3.66801 | -3.54648 | 0.539731 | -4.78302 | -2.38392 |
| species | OTU6000  | -3.77794 | -3.78704 | 0.615655 | -4.9479  | -2.40149 |
| species | OTU60504 | -3.87908 | -4.10243 | 0.690201 | -4.9479  | -1.90535 |
| species | OTU6068  | -4.07046 | -4.38108 | 0.650533 | -4.9479  | -1.79934 |
| species | OTU62137 | -3.7648  | -4.05477 | 0.810655 | -5.02378 | -1.45354 |
| species | OTU62773 | -3.81988 | -3.78774 | 0.552473 | -4.9479  | -2.49771 |
| species | OTU6284  | -3.48253 | -3.62762 | 0.973652 | -5.02378 | -0.61434 |
| species | OTU6324  | -4.34604 | -4.44267 | 0.37454  | -5.02378 | -1.93008 |
| species | OTU6326  | -3.93773 | -4.20672 | 0.662662 | -4.93233 | -2.202   |
| species | OTU63993 | -4.32668 | -4.44932 | 0.502719 | -4.9479  | -1.58552 |
| species | OTU64213 | -3.74468 | -3.75686 | 0.634961 | -4.9479  | -1.75996 |
| species | OTU64589 | -4.40202 | -4.45326 | 0.309712 | -5.02378 | -1.83018 |
| species | OTU65403 | -4.01618 | -4.35079 | 0.647713 | -5.02378 | -2.27394 |
| species | OTU65505 | -4.41942 | -4.46359 | 0.375163 | -5.02378 | -1.41195 |
| species | OTU66878 | -3.92443 | -4.01774 | 0.600743 | -4.90352 | -2.25856 |
| species | OTU67167 | -4.2077  | -4.43476 | 0.620536 | -5.02378 | -1.75072 |
| species | OTU6836  | -3.86914 | -4.10992 | 0.680885 | -4.9479  | -2.14752 |
| species | OTU68552 | -3.91766 | -4.27533 | 0.676627 | -4.84001 | -2.05529 |
| species | OTU68927 | -3.95034 | -4.31437 | 0.681689 | -5.02378 | -1.97061 |
| species | OTU699   | -2.7175  | -2.57095 | 0.857761 | -4.9479  | -1.1064  |
| species | OTU7027  | -2.91933 | -2.84029 | 0.518671 | -4.7489  | -1.93077 |
| species | OTU70446 | -4.1151  | -4.41737 | 0.658577 | -5.02378 | -1.62378 |
| species | OTU70876 | -3.8707  | -4.10721 | 0.708993 | -4.9479  | -1.82137 |
| species | OTU72339 | -4.11082 | -4.40085 | 0.596713 | -5.02378 | -2.1489  |
| species | OTU72899 | -3.72933 | -3.81258 | 0.70777  | -5.02378 | -2.03794 |
| species | OTU7358  | -3.83094 | -4.20876 | 0.789203 | -4.9479  | -1.65466 |
| species | OTU74000 | -4.20008 | -4.42566 | 0.583955 | -4.9479  | -1.67468 |
| species | OTU7445  | -3.48074 | -3.39872 | 0.600587 | -5.02378 | -1.94244 |
| species | OTU7731  | -3.57778 | -3.54452 | 0.719975 | -4.9479  | -1.89456 |
| species | OTU81797 | -4.21358 | -4.43476 | 0.607295 | -5.02378 | -1.93632 |
| species | OTU81863 | -4.12111 | -4.37011 | 0.510868 | -4.93233 | -2.26951 |
| species | OTU82932 | -3.94722 | -4.31572 | 0.679891 | -5.02378 | -2.31232 |
| species | OTU83309 | -3.75742 | -3.75374 | 0.581932 | -4.84991 | -2.31081 |



|         |                                      |          |          |          |          |          |
|---------|--------------------------------------|----------|----------|----------|----------|----------|
| species | <i>OTU8371</i>                       | -3.76938 | -3.84559 | 0.712584 | -5.02378 | -1.8767  |
| species | <i>OTU8674</i>                       | -2.14747 | -1.91116 | 0.890267 | -4.9479  | -0.78158 |
| species | <i>OTU8773</i>                       | -2.23689 | -2.00781 | 0.779774 | -4.68153 | -1.13829 |
| species | <i>OTU9283</i>                       | -3.50389 | -3.63367 | 0.92119  | -4.84991 | -1.08642 |
| species | <i>OTU9465</i>                       | -3.38508 | -3.32167 | 0.581715 | -4.7489  | -2.17763 |
| species | <i>OTU9628</i>                       | -3.95166 | -4.25842 | 0.642719 | -4.9479  | -2.39398 |
| species | <i>OTU9952</i>                       | -3.23312 | -3.37134 | 1.086413 | -5.02378 | -0.44953 |
| species | <i>Parabacteroides_OTU3</i>          | -2.75038 | -2.69368 | 0.623876 | -4.41929 | -1.02101 |
| species | <i>Parabacteroides_OTU4</i>          | -2.51175 | -2.41222 | 0.641986 | -4.28262 | -1.06389 |
| species | <i>Parabacteroides_OTU8</i>          | -2.20975 | -2.1569  | 0.624908 | -4.30492 | -0.86008 |
| species | <i>Roseburia_OTU7</i>                | -2.82821 | -2.76805 | 0.476097 | -4.3996  | -1.50323 |
| species | <i>Ruminococcus lactaris ATCC 29</i> | -2.446   | -2.41112 | 0.540844 | -4.34139 | -1.06045 |
| species | <i>Ruminococcus torques ATCC 27</i>  | -2.86667 | -2.73167 | 0.720781 | -4.51092 | -1.45032 |
| species | <i>Streptococcus suis 05ZYH33</i>    | -3.57729 | -3.60363 | 0.449597 | -4.55945 | -1.99328 |
| species | <i>Streptophyta_OTU17</i>            | -3.12519 | -3.23411 | 0.823953 | -4.60249 | -0.48468 |
| species | <i>TM7_genera_incertae_sedis_C</i>   | -3.25658 | -3.21633 | 0.567614 | -4.55823 | -1.61921 |
| species | <i>TM7_genera_incertae_sedis_C</i>   | -3.06357 | -2.97154 | 0.622619 | -4.51092 | -1.49338 |
| species | <i>TM7_genera_incertae_sedis_C</i>   | -3.43513 | -3.39141 | 0.565858 | -4.55823 | -1.75789 |
| species | <i>Turicibacter_OTU30</i>            | -3.10466 | -3.24638 | 0.948272 | -4.64687 | -0.84344 |
| species | <i>Variovorax paradoxus (T)</i>      | -2.85    | -2.84238 | 0.57944  | -4.25101 | -0.66529 |
| species | <i>Weissella confusa (T)</i>         | -2.93596 | -2.81152 | 0.62674  | -4.64687 | -1.22192 |
