# Supplementary material for: Host genetics and diet, but not immunoglobulin A expression, converge to shape compositional features of the gut microbiome in an advanced intercross population of mice
Source: PubMed Central journal article supplement (PMC4290092; doi:10.1186/s13059-014-0552-6), 2014-12-17
Supplement: 13059_2014_552_MOESM5_ESM.pdf [file 13059_2014_552_MOESM5_ESM.pdf]

**Additional File 5.** QTL statistics for the microbiome traits in the G<sub>4</sub> mouse population.

| Trait                    | Nearest Marker | MMU | Peak Position (Mb) | Naive LOD | GRAIP LOD | CI (Mb) |
|--------------------------|----------------|-----|--------------------|-----------|-----------|---------|
| Helicobacter ganmani (T) | JAX00138460    | 6   | 18.6               | 8.7       | 4.0*      | -40     |
| Lactococcus lactis       | JAX00022058    | 10  | 106.9              | 8.2       | 4.0*      | 95-111  |
| OTU4622                  | JAX00005735    | 1   | 80.0               | 9.6       | 4.0*      | 58-139  |
| OTU4622                  | JAX00300375    | 10  | 119.4              | 6.2       | 3.9       | 115-123 |
| OTU20360                 | JAX00258190    | 1   | 90.0               | 8.3       | 4.0*      | 70-146  |
| OTU11573                 | JAX00008045    | 1   | 112.7              | 8.2       | 4.0*      | 70-140  |
| OTU11573                 | JAX00010715    | 1   | 149.0              | 5.8       | 3.7       | 143-150 |
| OTU16907                 | JAX00261568    | 1   | 106.6              | 8.5       | 4.0*      | 66-139  |
| OTU41577                 | JAX00008045    | 1   | 112.7              | 9.0       | 4.0*      | 57-152  |
| OTU72899                 | JAX00240652    | 1   | 3.5                | 7.3       | 4.0*      | -13     |
|                          | JAX00436582    | 17  | 33.2               | 6.5       | 4.0*      | 28-48   |
| OTU390                   | JAX00431384    | 17  | 10.4               | 9.1       | 3.9       | 7-15    |
| OTU42081                 | JAX00171082    | 9   | 49.8               | 8.6       | 3.6       | 45-54   |
|                          | JAX00431384    | 17  | 10.4               | 7.3       | 3.6       | 6-15    |
| OTU12884                 | JAX00010715    | 1   | 148.6              | 6.1       | 3.9       | 143-150 |
| OTU31161                 | JAX00160567    | 8   | 36.6               | 8.0       | 3.7       | 32-45   |
| OTU15599                 | JAX00008766    | 1   | 122.5              | 7.2       | 4.0*      | 104-125 |
| Turcibacter_OTU30        | JAX00645933    | 7   | 85.9               | 8.0       | 4.0*      | 69-114  |

LOD exceeding the 95% ( $P \leq 0.05$ ,  $\text{LOD} \geq 3.9$ ) permutation threshold are denoted by \*; other QTL exceeded the 90% ( $P \leq 0.1$ ,  $\text{LOD} \geq 3.5$ ) threshold.

Confidence intervals (CIs) for QTL positions were obtained using a 1.0 LOD drop in Mb (relative to the GRAIP permuted LOD score).
