# Supplementary material for: Host genetics and diet, but not immunoglobulin A expression, converge to shape compositional features of the gut microbiome in an advanced intercross population of mice
Source: PubMed Central journal article supplement (PMC4290092; doi:10.1186/s13059-014-0552-6), 2014-12-17
Supplement: 13059_2014_552_MOESM6_ESM.pdf [file 13059_2014_552_MOESM6_ESM.pdf]

Additional file 6. Means, standard deviations (SD), and minimum and maximum values of the log of the of the proportion of sequence reads for each IgA taxon. The sample size = 300 in all cases.

| IgA  | Mean   | SD    | Minimum | Maximum |
|------|--------|-------|---------|---------|
| B30  | -2.101 | 0.339 | -3.298  | -1.092  |
| B44  | -2.123 | 0.448 | -3.800  | -1.156  |
| B45  | -1.864 | 0.378 | -3.077  | -0.712  |
| B76  | -1.617 | 0.337 | -2.556  | -0.523  |
| B41  | -1.453 | 0.268 | -2.232  | -0.629  |
| B88  | -1.543 | 0.472 | -3.027  | -0.449  |
| B89  | -1.383 | 0.313 | -2.396  | -0.271  |
| B59  | -1.226 | 0.237 | -1.987  | -0.598  |
| B178 | -2.360 | 0.359 | -3.379  | -1.263  |
| B244 | -2.281 | 0.472 | -3.743  | -1.187  |
| B48  | -2.088 | 0.462 | -3.901  | -0.901  |
| B57  | -1.989 | 0.383 | -3.227  | -0.789  |
| B23  | -2.322 | 0.398 | -3.692  | -1.200  |
| B212 | -2.121 | 0.418 | -3.815  | -0.824  |
| B11  | -2.146 | 0.519 | -4.305  | -0.480  |
| B17  | -1.814 | 0.427 | -3.828  | -0.760  |
| B75  | -1.787 | 0.477 | -4.200  | -0.482  |
| B37  | -1.593 | 0.549 | -3.928  | -0.425  |
| B200 | -2.421 | 0.414 | -4.074  | -1.353  |
| B14  | -2.406 | 0.434 | -3.803  | -1.138  |
| B80  | -2.409 | 0.485 | -3.817  | -1.053  |
| B42  | -2.228 | 0.525 | -3.572  | -0.830  |
| B71  | -2.094 | 0.511 | -4.081  | -0.879  |
| B172 | -2.062 | 0.448 | -3.771  | -1.018  |
| B198 | -2.553 | 0.409 | -3.713  | -1.560  |
| B91  | -1.906 | 0.506 | -4.353  | -1.069  |
| B72  | -1.930 | 0.612 | -4.034  | -0.661  |
| B54  | -2.323 | 0.482 | -3.558  | -0.607  |
| B87  | -2.049 | 0.654 | -3.793  | -0.305  |
| B67  | -2.530 | 0.495 | -4.185  | -1.096  |
| B15  | -2.503 | 0.509 | -4.208  | -1.059  |
| B78  | -2.332 | 0.576 | -4.194  | -0.821  |
| B93  | -1.812 | 0.746 | -4.193  | -0.076  |
| B61  | -2.046 | 0.668 | -4.150  | -0.394  |
| B79  | -2.018 | 0.712 | -4.231  | 0.015   |
| B73  | -2.735 | 0.509 | -4.228  | -1.345  |
| B43  | -2.506 | 0.641 | -4.500  | -1.118  |
| B195 | -1.974 | 0.658 | -4.456  | -0.742  |
| B55  | -2.698 | 0.559 | -4.587  | -1.370  |
| B50  | -2.583 | 0.656 | -4.370  | -0.596  |

|      |        |       |        |        |
|------|--------|-------|--------|--------|
| B46  | -2.022 | 0.797 | -4.664 | -0.597 |
| B33  | -2.812 | 0.495 | -4.214 | -1.089 |
| B92  | -2.367 | 0.747 | -4.241 | -0.560 |
| B64  | -2.753 | 0.639 | -4.401 | -1.353 |
| B60  | -2.448 | 0.745 | -4.298 | -0.594 |
| B82  | -2.823 | 0.559 | -4.435 | -1.153 |
| B182 | -2.911 | 0.486 | -4.266 | -1.465 |
| B10  | -1.840 | 0.927 | -4.539 | -0.450 |
| B40  | -2.885 | 0.551 | -4.479 | -0.847 |
| B153 | -1.938 | 0.932 | -4.884 | -0.377 |
| B122 | -3.187 | 0.414 | -4.492 | -1.943 |
| B234 | -3.201 | 0.492 | -4.652 | -1.729 |
| B83  | -3.192 | 0.519 | -4.573 | -1.425 |
| B114 | -2.582 | 0.819 | -4.934 | -0.601 |
| B237 | -3.272 | 0.535 | -4.773 | -1.450 |
| B194 | -3.209 | 0.593 | -4.585 | -1.682 |
| B197 | -3.269 | 0.581 | -4.734 | -1.606 |
| B217 | -2.944 | 0.693 | -4.913 | -1.216 |
| B223 | -3.096 | 0.633 | -4.810 | -1.345 |
| B81  | -3.217 | 0.548 | -4.872 | -1.850 |
| B47  | -3.177 | 0.623 | -4.722 | -1.112 |
| B63  | -3.119 | 0.683 | -4.770 | -1.412 |
| B218 | -3.086 | 0.693 | -5.082 | -1.567 |
| B189 | -3.253 | 0.577 | -4.510 | -1.649 |
| B207 | -3.065 | 0.684 | -5.061 | -1.600 |
| B175 | -3.268 | 0.632 | -4.761 | -1.518 |
| B196 | -3.383 | 0.582 | -4.821 | -1.645 |

---
