# Supplementary material for: Host genetics and diet, but not immunoglobulin A expression, converge to shape compositional features of the gut microbiome in an advanced intercross population of mice
Source: PubMed Central journal article supplement (PMC4290092; doi:10.1186/s13059-014-0552-6), 2014-12-17
Supplement: 13059_2014_552_MOESM7_ESM.pdf [file 13059_2014_552_MOESM7_ESM.pdf]

Additional file 7. Estimates of four random components (cohort, family, parity, and residual) and their proportion of the total variation, for each of the 67 IgA taxa.

| Taxon | Variance Components |        |        |          | % of Total Variation |        |        |          |
|-------|---------------------|--------|--------|----------|----------------------|--------|--------|----------|
|       | Cohort              | Family | Parity | Residual | Cohort               | Family | Parity | Residual |
| B30   | 0.0016              | 0.0000 | 0.0177 | 0.1085   | 1.26                 | 0.00   | 13.85  | 84.89    |
| B44   | 0.0000              | 0.0000 | 0.0176 | 0.1977   | 0.00                 | 0.00   | 8.16   | 91.84    |
| B45   | 0.0000              | 0.0089 | 0.0088 | 0.1354   | 0.00                 | 5.82   | 5.72   | 88.46    |
| B76   | 0.0000              | 0.0012 | 0.0090 | 0.1105   | 0.00                 | 1.01   | 7.44   | 91.55    |
| B41   | 0.0118              | 0.0000 | 0.0113 | 0.0674   | 13.07                | 0.00   | 12.53  | 74.39    |
| B88   | 0.0580              | 0.0515 | 0.0000 | 0.1940   | 19.12                | 16.98  | 0.00   | 63.90    |
| B89   | 0.0036              | 0.0110 | 0.0050 | 0.0906   | 3.28                 | 10.02  | 4.55   | 82.16    |
| B59   | 0.0047              | 0.0116 | 0.0000 | 0.0498   | 7.17                 | 17.54  | 0.00   | 75.29    |
| B178  | 0.0000              | 0.0029 | 0.0064 | 0.1282   | 0.00                 | 2.09   | 4.69   | 93.22    |
| B244  | 0.0000              | 0.0024 | 0.0182 | 0.2185   | 0.00                 | 1.00   | 7.61   | 91.39    |
| B48   | 0.0147              | 0.0092 | 0.0018 | 0.2159   | 6.10                 | 3.81   | 0.73   | 89.36    |
| B57   | 0.0011              | 0.0207 | 0.0000 | 0.1371   | 0.68                 | 13.05  | 0.00   | 86.26    |
| B23   | 0.0000              | 0.0415 | 0.0000 | 0.1421   | 0.00                 | 22.61  | 0.00   | 77.39    |
| B212  | 0.0000              | 0.0027 | 0.0066 | 0.1741   | 0.00                 | 1.47   | 3.59   | 94.94    |
| B11   | 0.0097              | 0.0000 | 0.0000 | 0.2873   | 3.25                 | 0.00   | 0.00   | 96.75    |
| B17   | 0.0000              | 0.0253 | 0.0193 | 0.1500   | 0.00                 | 12.99  | 9.91   | 77.09    |
| B75   | 0.0065              | 0.0129 | 0.0038 | 0.2263   | 2.61                 | 5.16   | 1.50   | 90.72    |
| B37   | 0.0051              | 0.0816 | 0.0156 | 0.2369   | 1.51                 | 24.06  | 4.60   | 69.83    |
| B200  | 0.0112              | 0.0000 | 0.0000 | 0.1811   | 5.84                 | 0.00   | 0.00   | 94.16    |
| B14   | 0.0000              | 0.0265 | 0.0000 | 0.1739   | 0.00                 | 13.23  | 0.00   | 86.77    |
| B80   | 0.0000              | 0.0242 | 0.0000 | 0.2253   | 0.00                 | 9.71   | 0.00   | 90.29    |
| B42   | 0.0161              | 0.0186 | 0.0360 | 0.2505   | 5.00                 | 5.80   | 11.20  | 78.00    |
| B71   | 0.0000              | 0.0080 | 0.0172 | 0.2479   | 0.00                 | 2.93   | 6.30   | 90.77    |
| B172  | 0.0034              | 0.0631 | 0.0000 | 0.1608   | 1.50                 | 27.76  | 0.00   | 70.74    |
| B198  | 0.0035              | 0.0027 | 0.0000 | 0.1735   | 1.97                 | 1.48   | 0.00   | 96.55    |
| B91   | 0.0031              | 0.0372 | 0.0253 | 0.2218   | 1.09                 | 12.93  | 8.81   | 77.18    |
| B72   | 0.0403              | 0.1533 | 0.0000 | 0.2863   | 8.39                 | 31.95  | 0.01   | 59.66    |
| B54   | 0.0000              | 0.0350 | 0.0000 | 0.2128   | 0.00                 | 14.12  | 0.00   | 85.88    |
| B87   | 0.0164              | 0.1127 | 0.0380 | 0.3399   | 3.23                 | 22.23  | 7.50   | 67.04    |
| B67   | 0.0047              | 0.0244 | 0.0000 | 0.2405   | 1.74                 | 9.05   | 0.00   | 89.21    |
| B15   | 0.0019              | 0.0130 | 0.0186 | 0.2482   | 0.68                 | 4.62   | 6.59   | 88.11    |
| B78   | 0.0046              | 0.0016 | 0.0294 | 0.3276   | 1.26                 | 0.44   | 8.10   | 90.21    |
| B93   | 0.0117              | 0.1826 | 0.0420 | 0.4140   | 1.81                 | 28.08  | 6.45   | 63.66    |
| B61   | 0.0202              | 0.1378 | 0.0520 | 0.3234   | 3.79                 | 25.84  | 9.75   | 60.62    |
| B79   | 0.0314              | 0.1865 | 0.0320 | 0.3708   | 5.05                 | 30.04  | 5.16   | 59.74    |
| B73   | 0.0037              | 0.0349 | 0.0000 | 0.2495   | 1.29                 | 12.11  | 0.00   | 86.60    |
| B43   | 0.0115              | 0.0000 | 0.0329 | 0.4111   | 2.53                 | 0.00   | 7.23   | 90.24    |
| B195  | 0.0459              | 0.0542 | 0.0036 | 0.4090   | 8.95                 | 10.58  | 0.69   | 79.78    |
| B55   | 0.0154              | 0.0653 | 0.0360 | 0.2575   | 4.11                 | 17.45  | 9.62   | 68.82    |
| B50   | 0.0000              | 0.0000 | 0.0133 | 0.4382   | 0.00                 | 0.00   | 2.94   | 97.06    |

|      |        |        |        |        |      |       |       |       |
|------|--------|--------|--------|--------|------|-------|-------|-------|
| B46  | 0.0000 | 0.2332 | 0.0146 | 0.4718 | 0.00 | 32.40 | 2.03  | 65.56 |
| B33  | 0.0112 | 0.0000 | 0.0187 | 0.2443 | 4.07 | 0.00  | 6.81  | 89.12 |
| B92  | 0.0136 | 0.1160 | 0.0192 | 0.4821 | 2.16 | 18.39 | 3.05  | 76.41 |
| B64  | 0.0363 | 0.0621 | 0.0040 | 0.3788 | 7.54 | 12.91 | 0.83  | 78.72 |
| B60  | 0.0047 | 0.1447 | 0.0587 | 0.4269 | 0.74 | 22.79 | 9.24  | 67.23 |
| B82  | 0.0299 | 0.0793 | 0.0000 | 0.2668 | 7.95 | 21.08 | 0.00  | 70.97 |
| B182 | 0.0161 | 0.0000 | 0.0020 | 0.2481 | 6.04 | 0.00  | 0.76  | 93.20 |
| B10  | 0.0042 | 0.3176 | 0.0000 | 0.6572 | 0.43 | 32.44 | 0.00  | 67.13 |
| B40  | 0.0002 | 0.0080 | 0.0066 | 0.3115 | 0.06 | 2.44  | 2.04  | 95.46 |
| B153 | 0.0003 | 0.2676 | 0.0000 | 0.7033 | 0.03 | 27.55 | 0.00  | 72.42 |
| B122 | 0.0000 | 0.0077 | 0.0080 | 0.1660 | 0.00 | 4.22  | 4.42  | 91.37 |
| B234 | 0.0109 | 0.0000 | 0.0376 | 0.2280 | 3.94 | 0.00  | 13.58 | 82.48 |
| B83  | 0.0072 | 0.0510 | 0.0000 | 0.2470 | 2.36 | 16.72 | 0.00  | 80.92 |
| B114 | 0.0000 | 0.1388 | 0.0692 | 0.5401 | 0.00 | 18.56 | 9.25  | 72.19 |
| B237 | 0.0229 | 0.0150 | 0.0002 | 0.2901 | 6.98 | 4.56  | 0.07  | 88.40 |
| B194 | 0.0000 | 0.0023 | 0.0000 | 0.3666 | 0.00 | 0.63  | 0.00  | 99.37 |
| B197 | 0.0016 | 0.0169 | 0.0000 | 0.3433 | 0.44 | 4.67  | 0.00  | 94.90 |
| B217 | 0.0086 | 0.0812 | 0.0083 | 0.4401 | 1.61 | 15.09 | 1.54  | 81.77 |
| B223 | 0.0000 | 0.1006 | 0.0000 | 0.3398 | 0.00 | 22.84 | 0.00  | 77.16 |
| B81  | 0.0263 | 0.0499 | 0.0087 | 0.2735 | 7.33 | 13.93 | 2.42  | 76.32 |
| B47  | 0.0078 | 0.0484 | 0.0000 | 0.3704 | 1.83 | 11.35 | 0.00  | 86.82 |
| B63  | 0.0135 | 0.1493 | 0.0006 | 0.3693 | 2.54 | 28.03 | 0.11  | 69.32 |
| B218 | 0.0205 | 0.1287 | 0.0005 | 0.4002 | 3.73 | 23.40 | 0.10  | 72.76 |
| B189 | 0.0293 | 0.0095 | 0.0000 | 0.3448 | 7.65 | 2.47  | 0.00  | 89.88 |
| B207 | 0.0168 | 0.1330 | 0.0000 | 0.3826 | 3.16 | 24.99 | 0.00  | 71.86 |
| B175 | 0.0000 | 0.0494 | 0.0370 | 0.3538 | 0.00 | 11.22 | 8.41  | 80.37 |
| B196 | 0.0000 | 0.0640 | 0.0000 | 0.3043 | 0.00 | 17.37 | 0.00  | 82.63 |

---
